# Supplementary material for: Molecular Correlates of Hemorrhage and Edema Volumes Following Human Intracerebral Hemorrhage Implicate Inflammation, Autophagy, mRNA Splicing, and T Cell Receptor Signaling
Source: PubMed Central journal article supplement (PMC8421315; doi:10.1007/s12975-020-00869-y), 2020-11-18

# Supplemental Figures

for

## **Molecular Correlates of Hemorrhage and Edema Volumes following Human Intracerebral Hemorrhage Implicate Inflammation, Autophagy, mRNA Splicing, and T Cell Receptor Signaling**

*Translational Stroke Research*

Marc Durocher<sup>1\*</sup>, Bodie Knepp<sup>1\*</sup>, Alan Yee<sup>1</sup>, Glen Jickling<sup>1,2</sup>, Fernando Rodriguez<sup>1</sup>, Kwan Ng<sup>1</sup>, Xinhua Zhan<sup>1</sup>, Farah Hamade<sup>1</sup>, Eva Ferino<sup>1</sup>, Hajar Amini<sup>1</sup>, Paulina Carmona-Mora<sup>1</sup>, Heather Hull<sup>1</sup>, Bradley P. Ander<sup>1</sup>, Frank R. Sharp<sup>1</sup> and Boryana Stamova<sup>1</sup>

\*co-first authors

<sup>1</sup>Department of Neurology, School of Medicine, University of California at Davis, Sacramento, CA, USA.

<sup>2</sup>Department of Medicine, University of Alberta, Edmonton, Canada.

Corresponding Author: Boryana Stamova (bsstamova@ucdavis.edu)

Fig. S1 NLRP3 VisANT Subnetwork

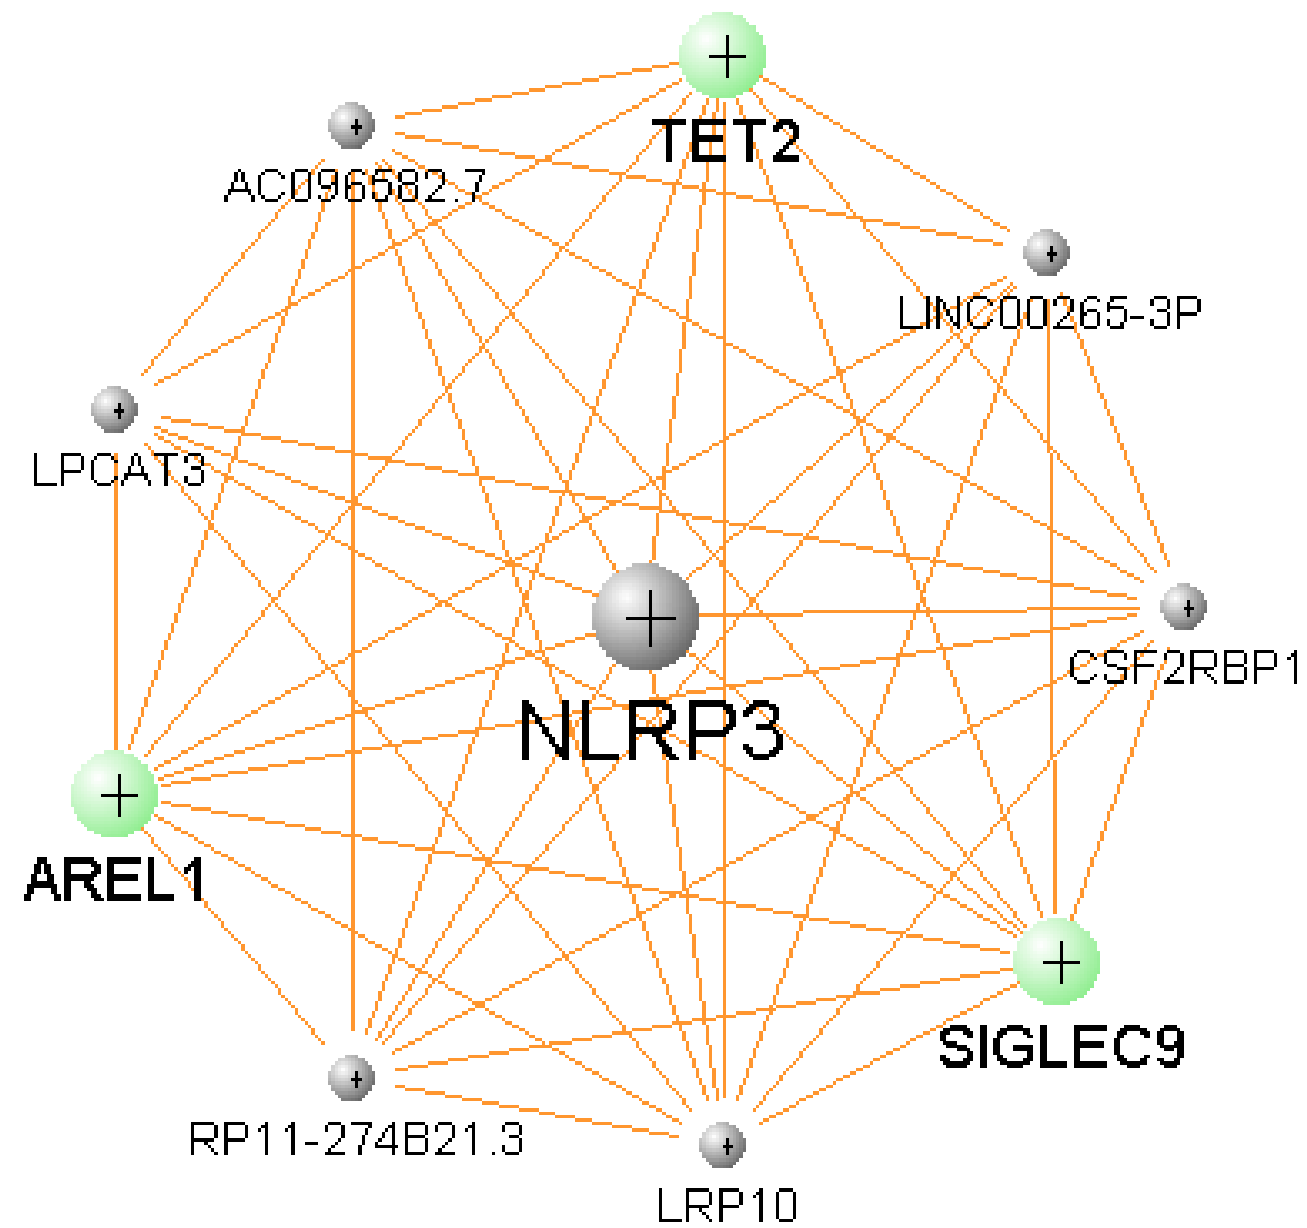



Fig. S3 NCF2 VisANT Subnetwork

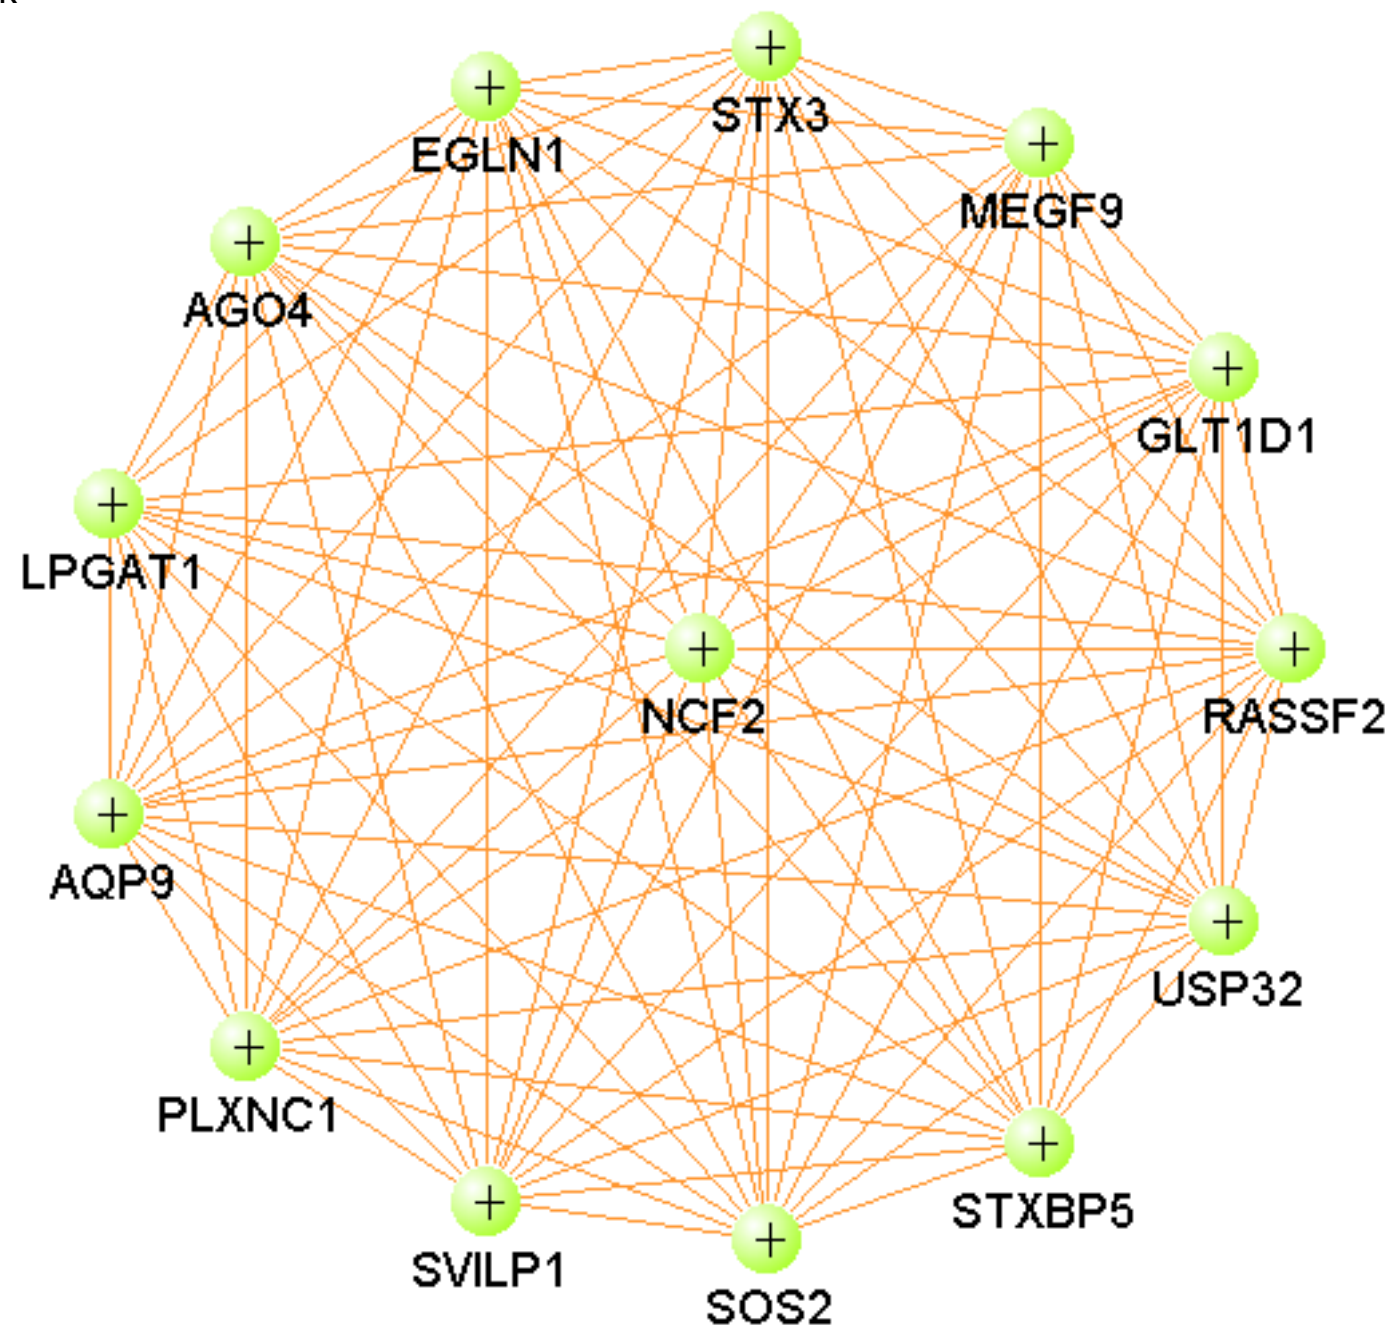



**Fig. S4** CSF3R VisANT Subnetwork

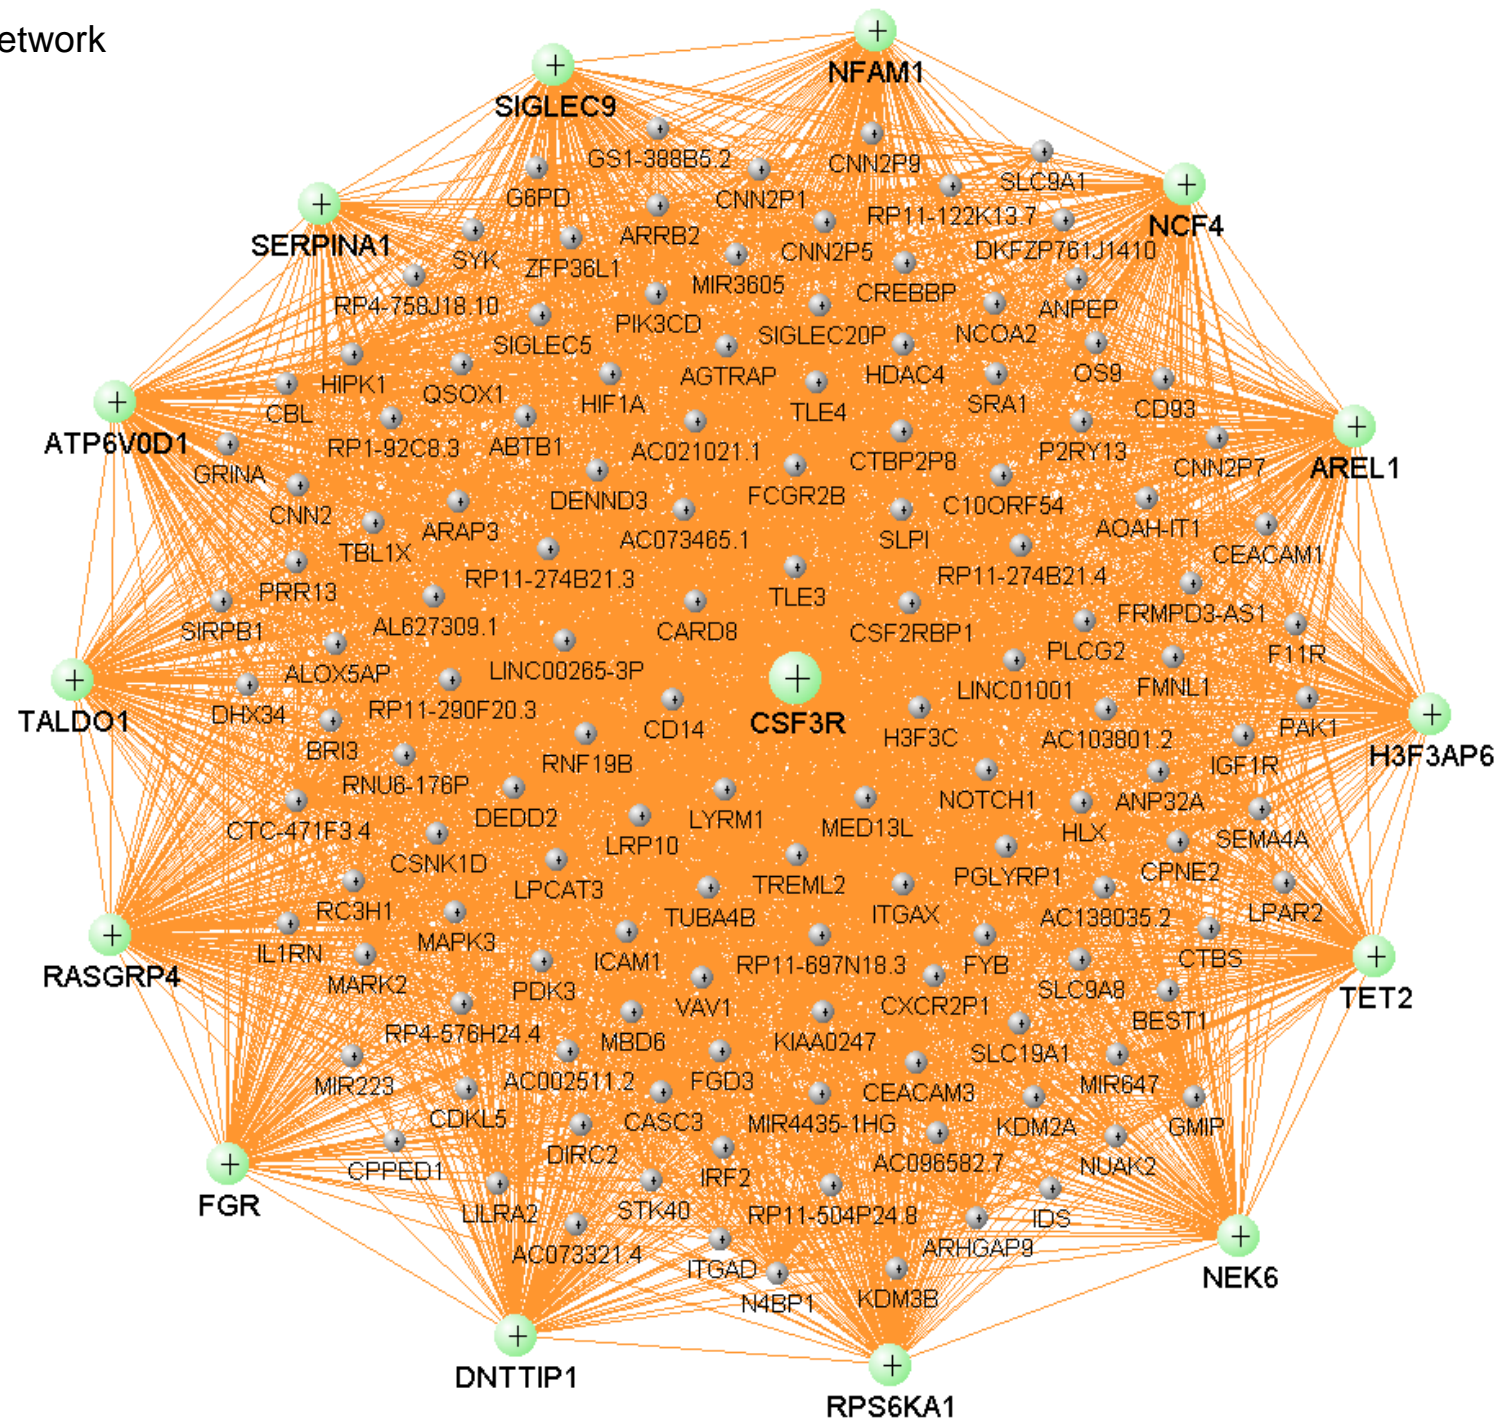

**Fig. S5** Magenta T Cell Signaling Pathway using ICH correlations

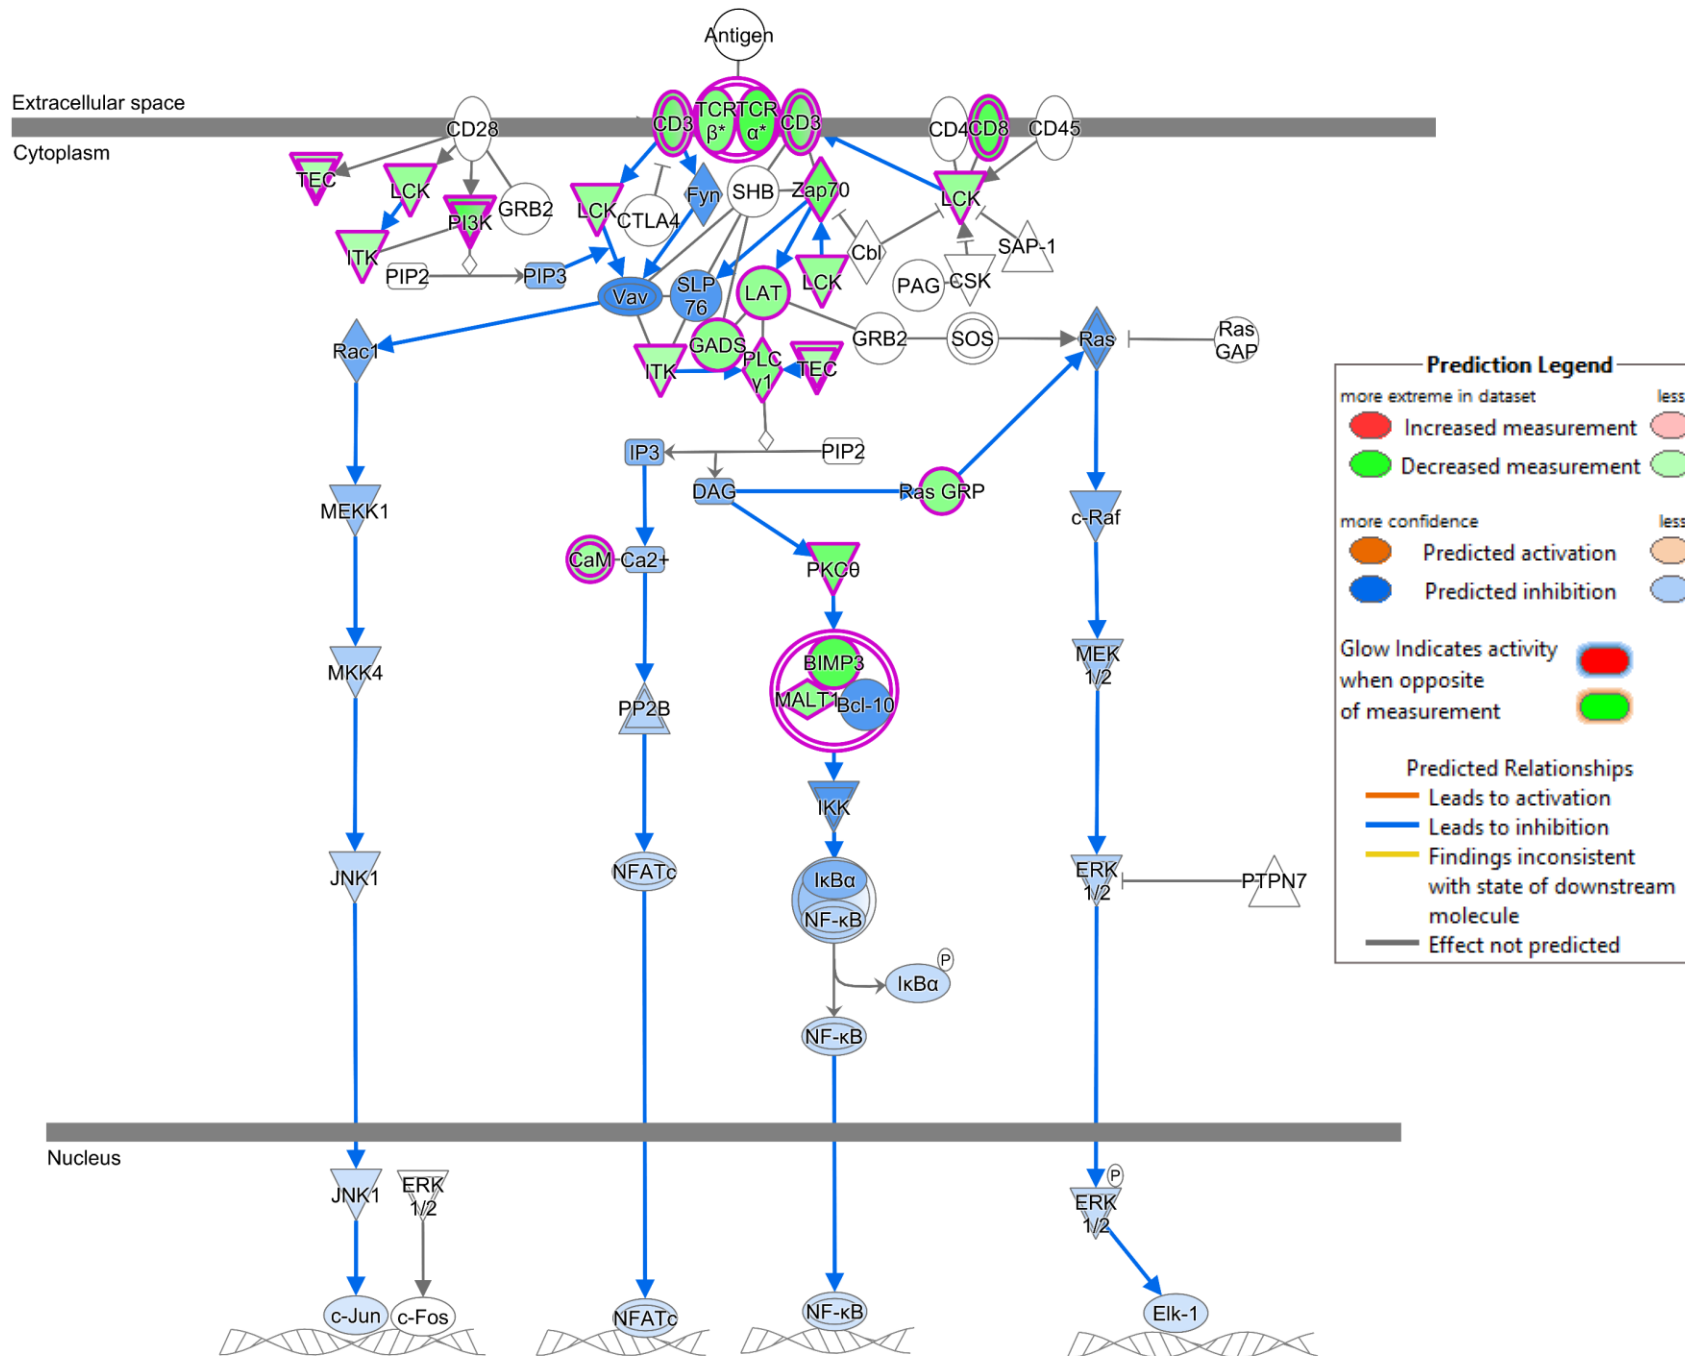

Fig. S6 TRAJ36 VisANT Subnetwork

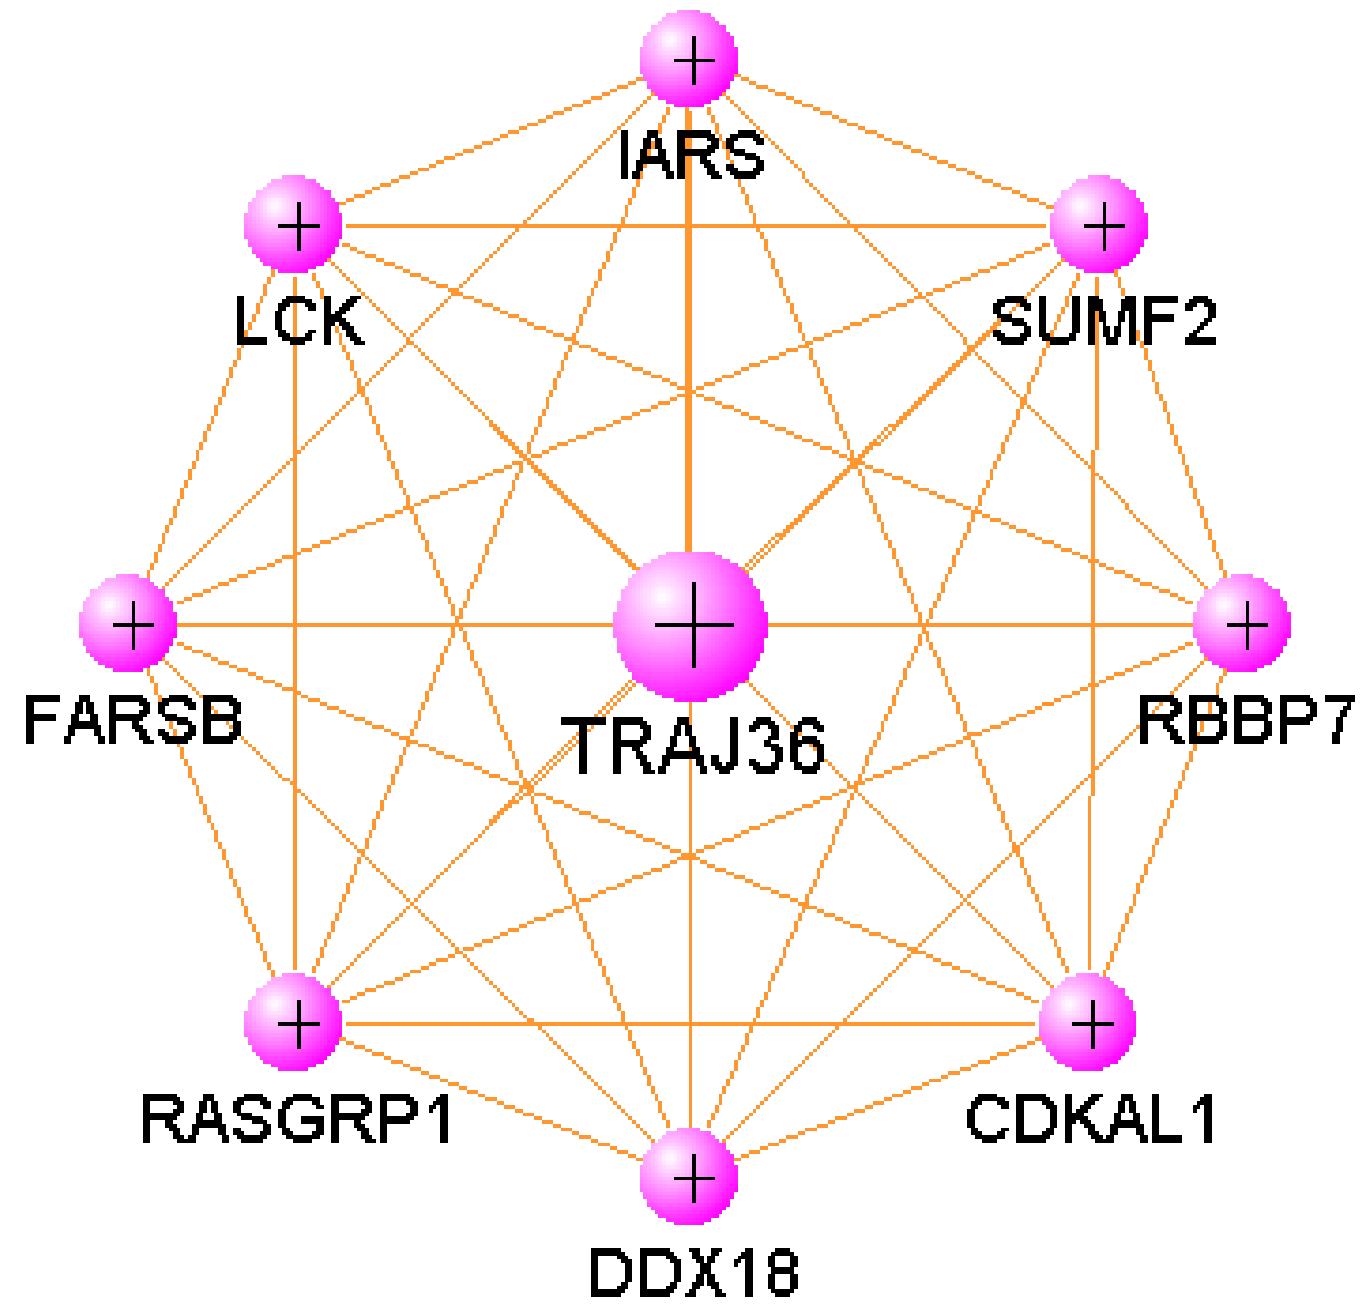

**Fig. S7** ITK VisANT Subnetwork

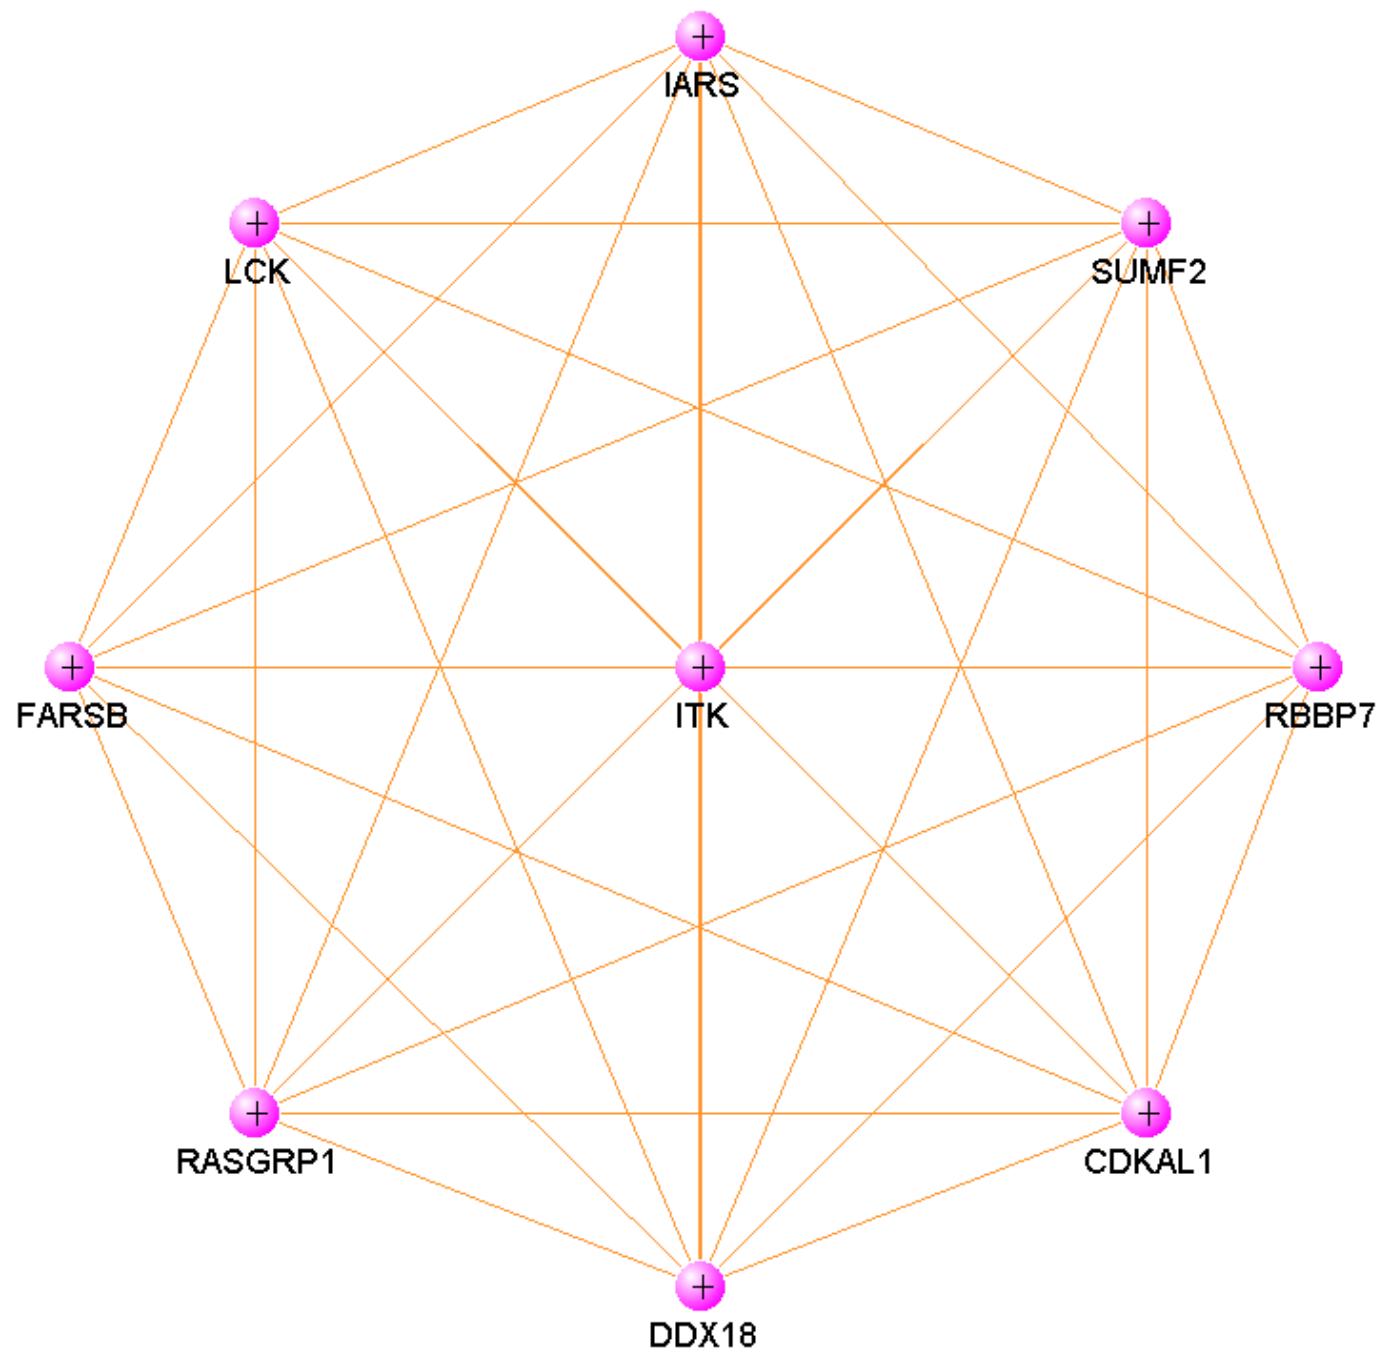



**Fig. S8** LCK VisANT Subnetwork

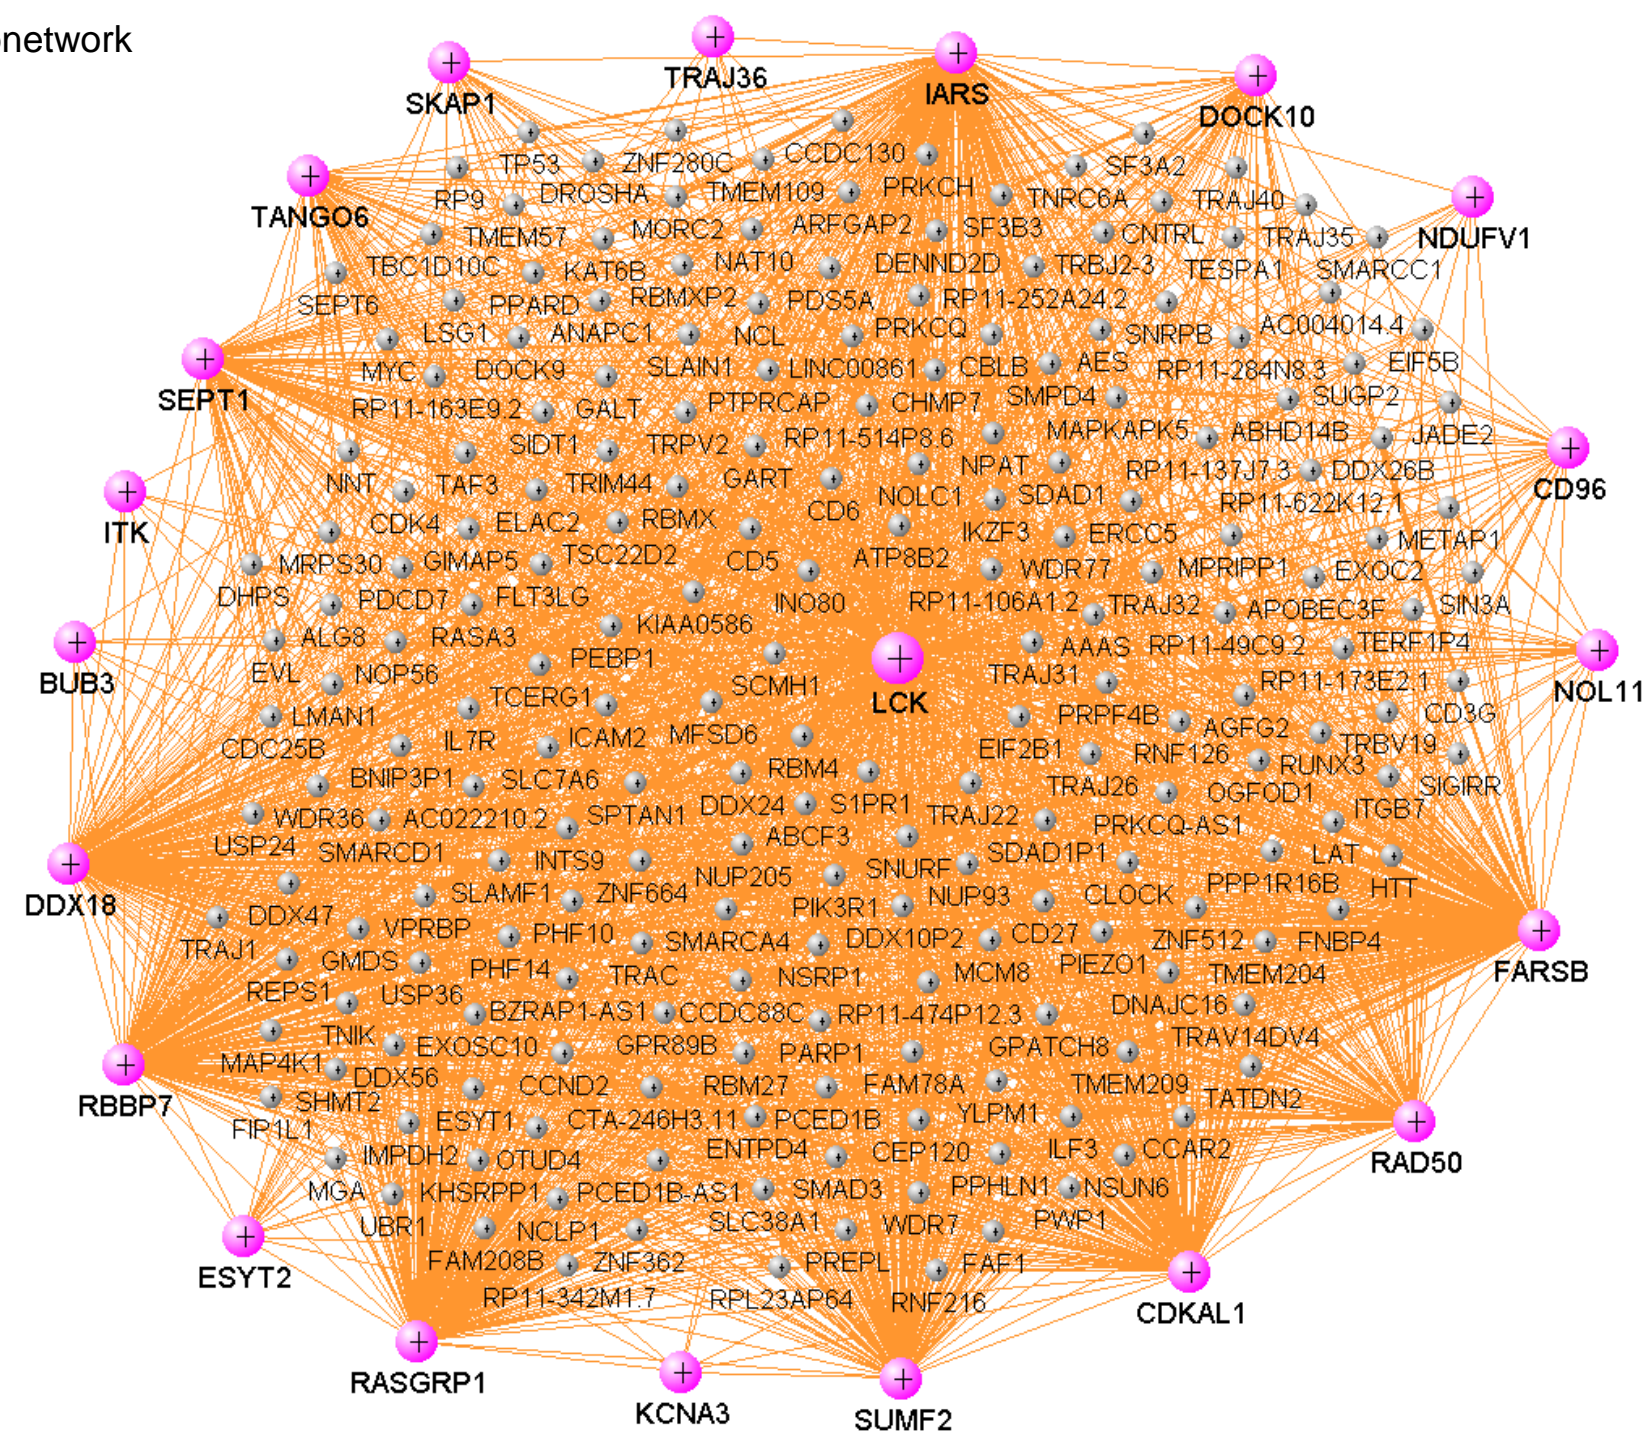

Fig. S9 S1PR1 VisANT Subnetwork

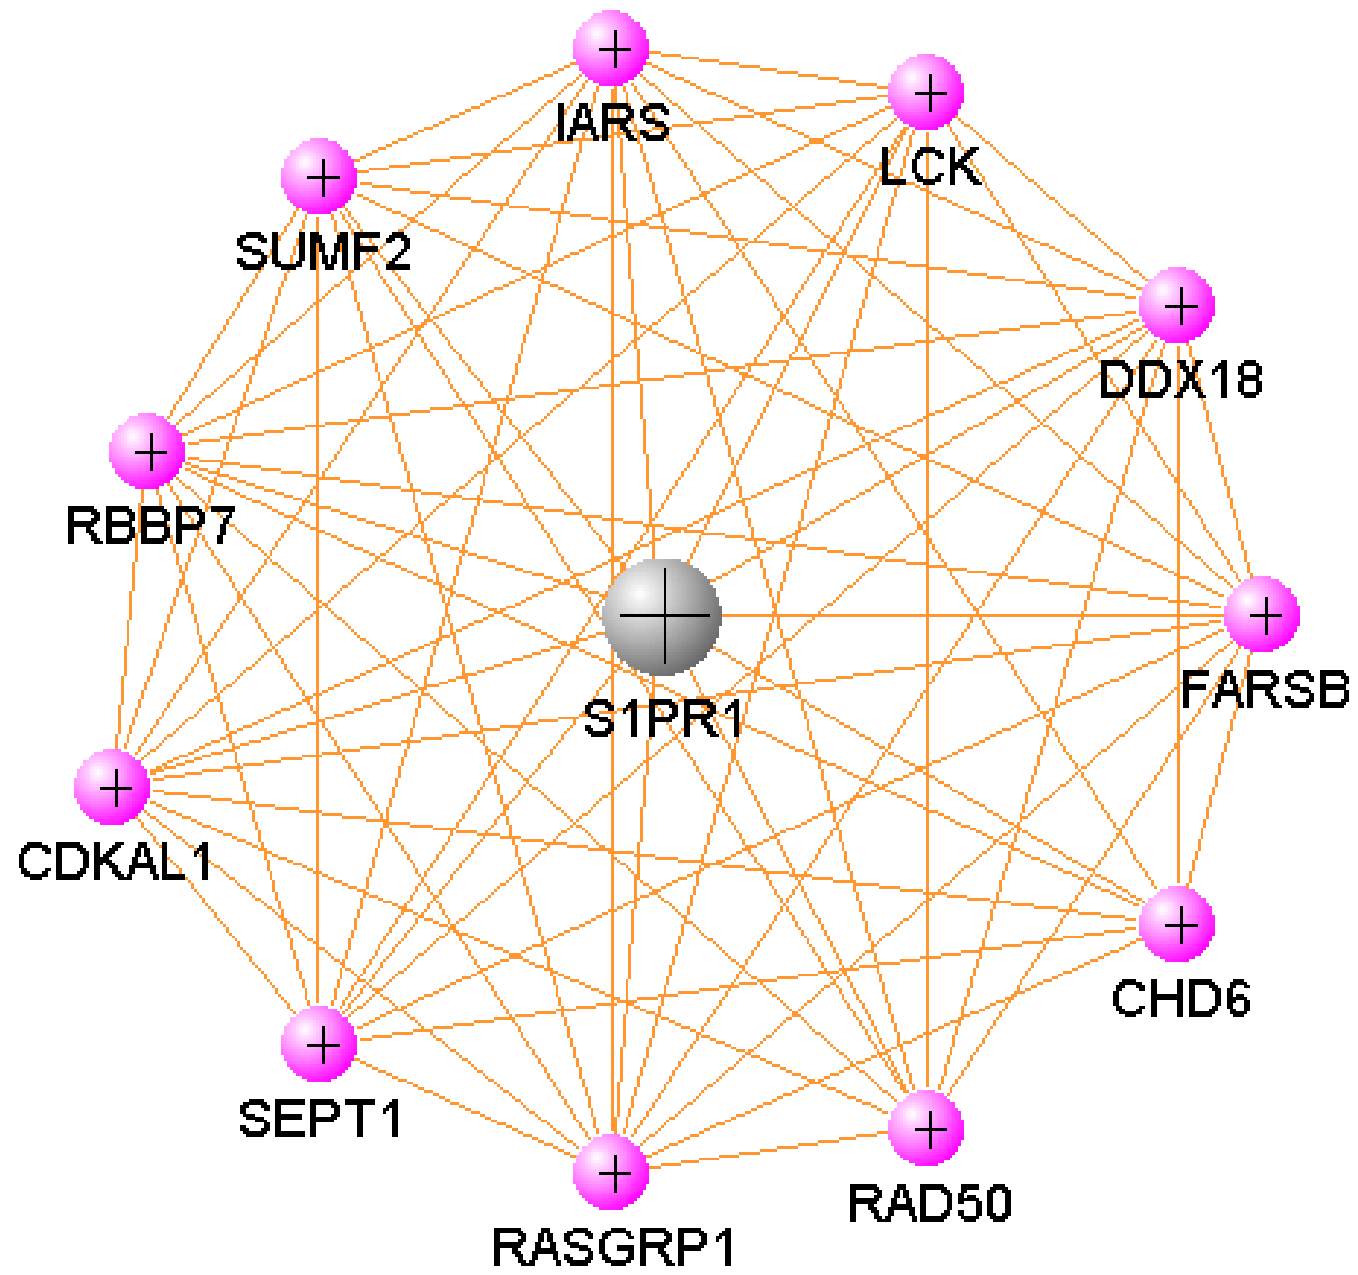

Fig. S10 SKAP1 VisANT Subnetwork

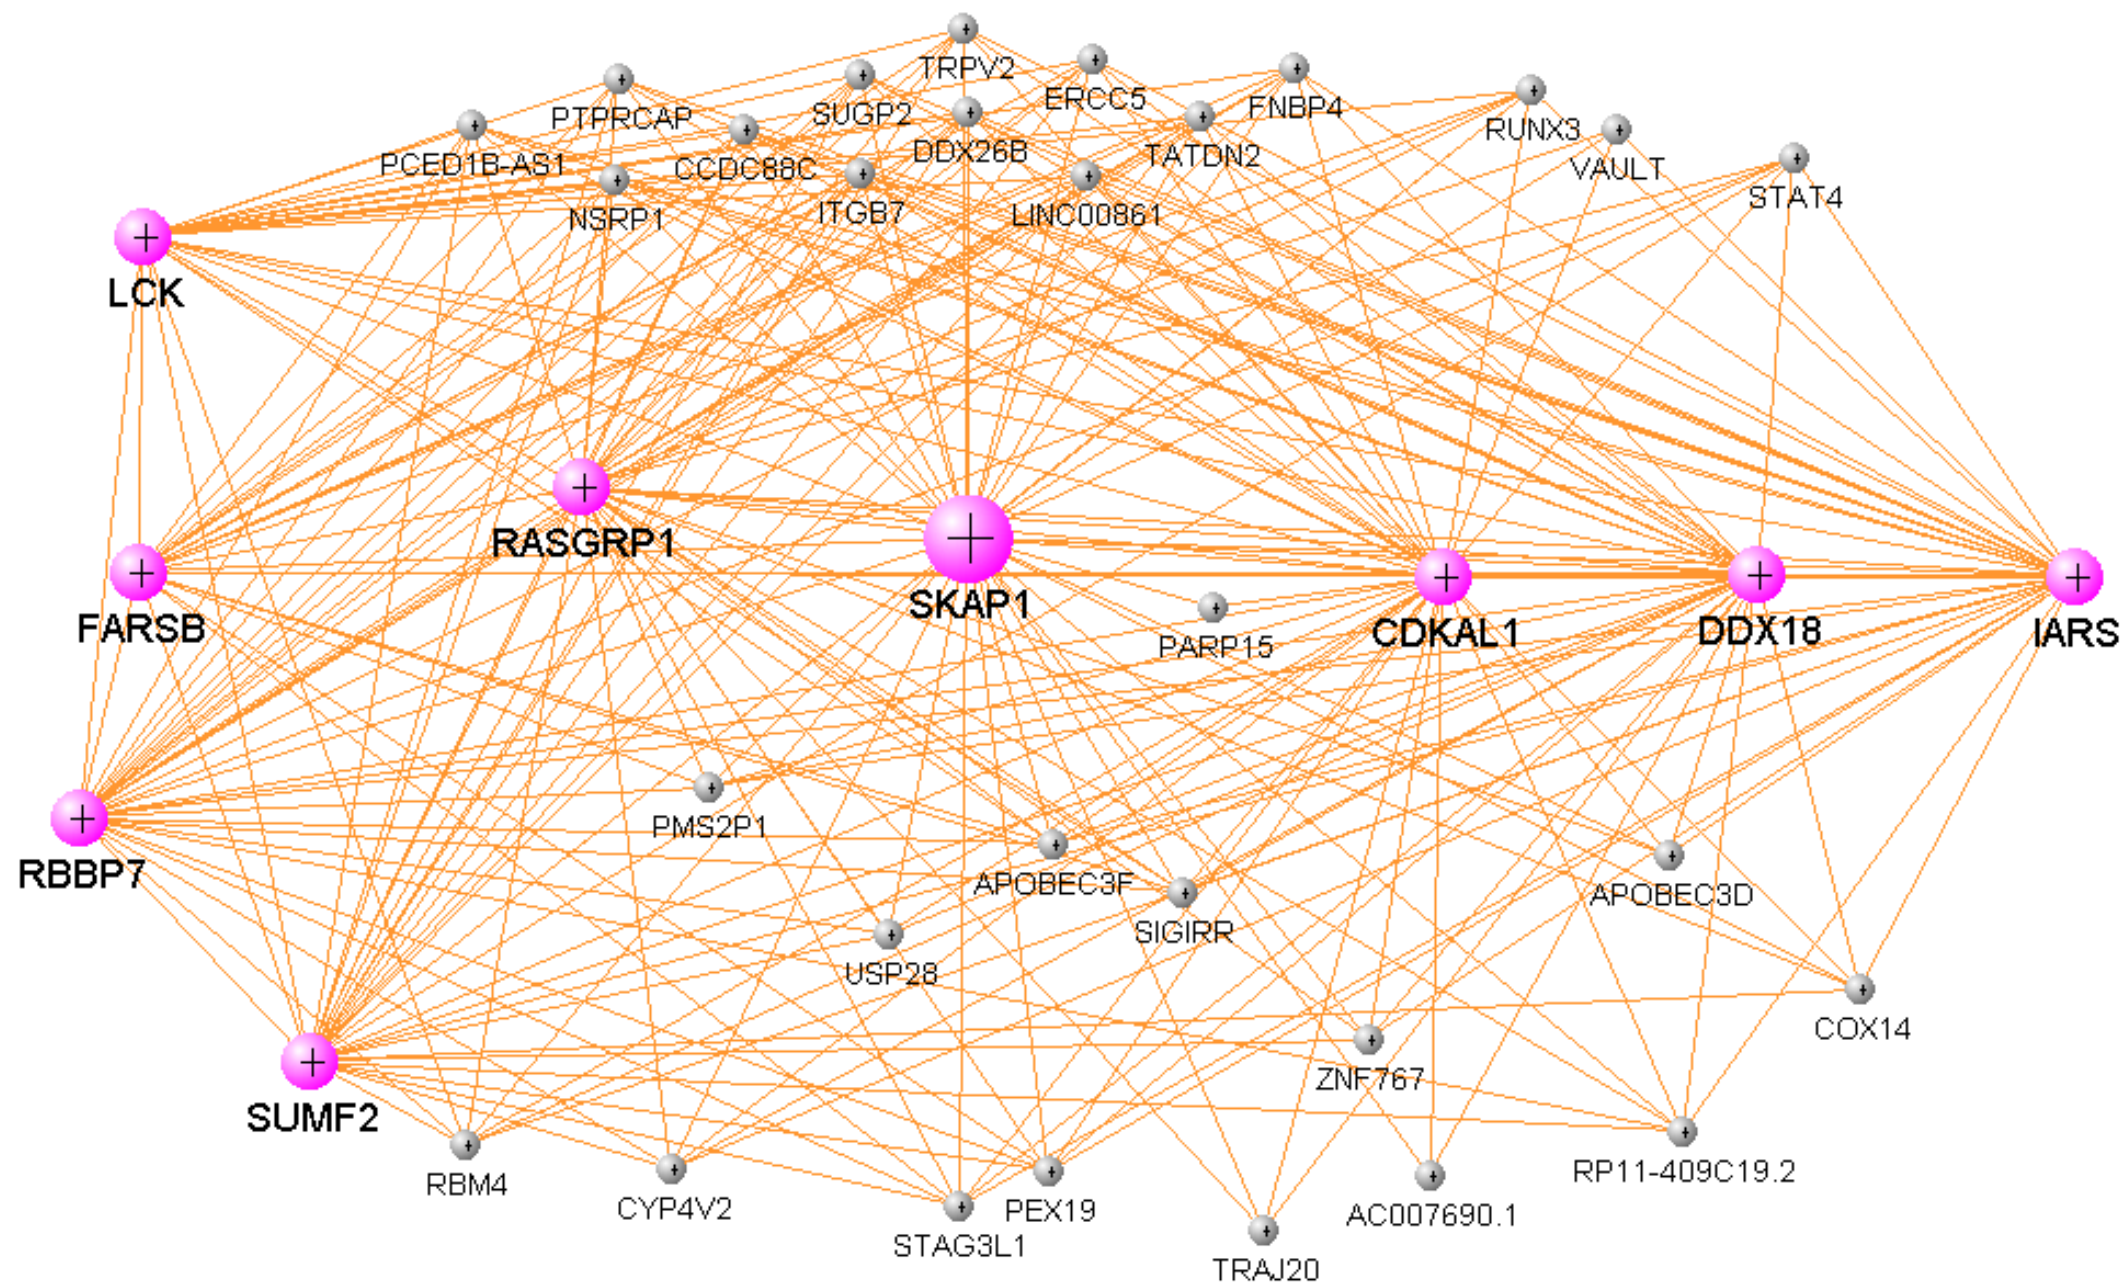

**Fig. S11 ICH-aPHE Plot and Correlation**

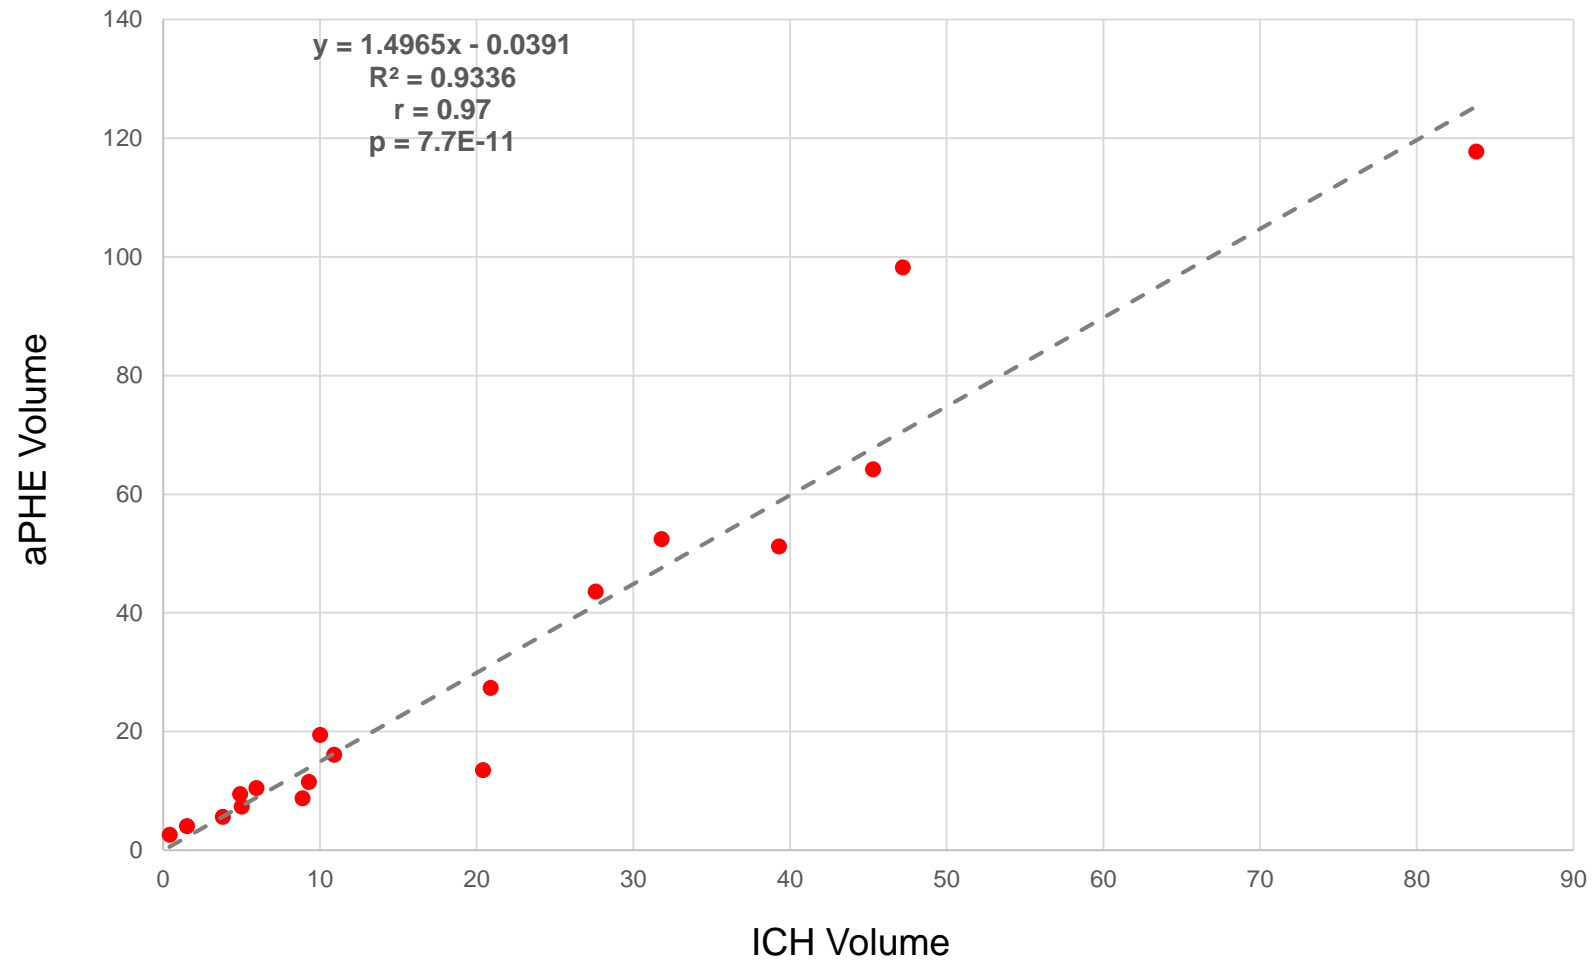

Fig. S12A ICH-rPHE Plot and Correlation

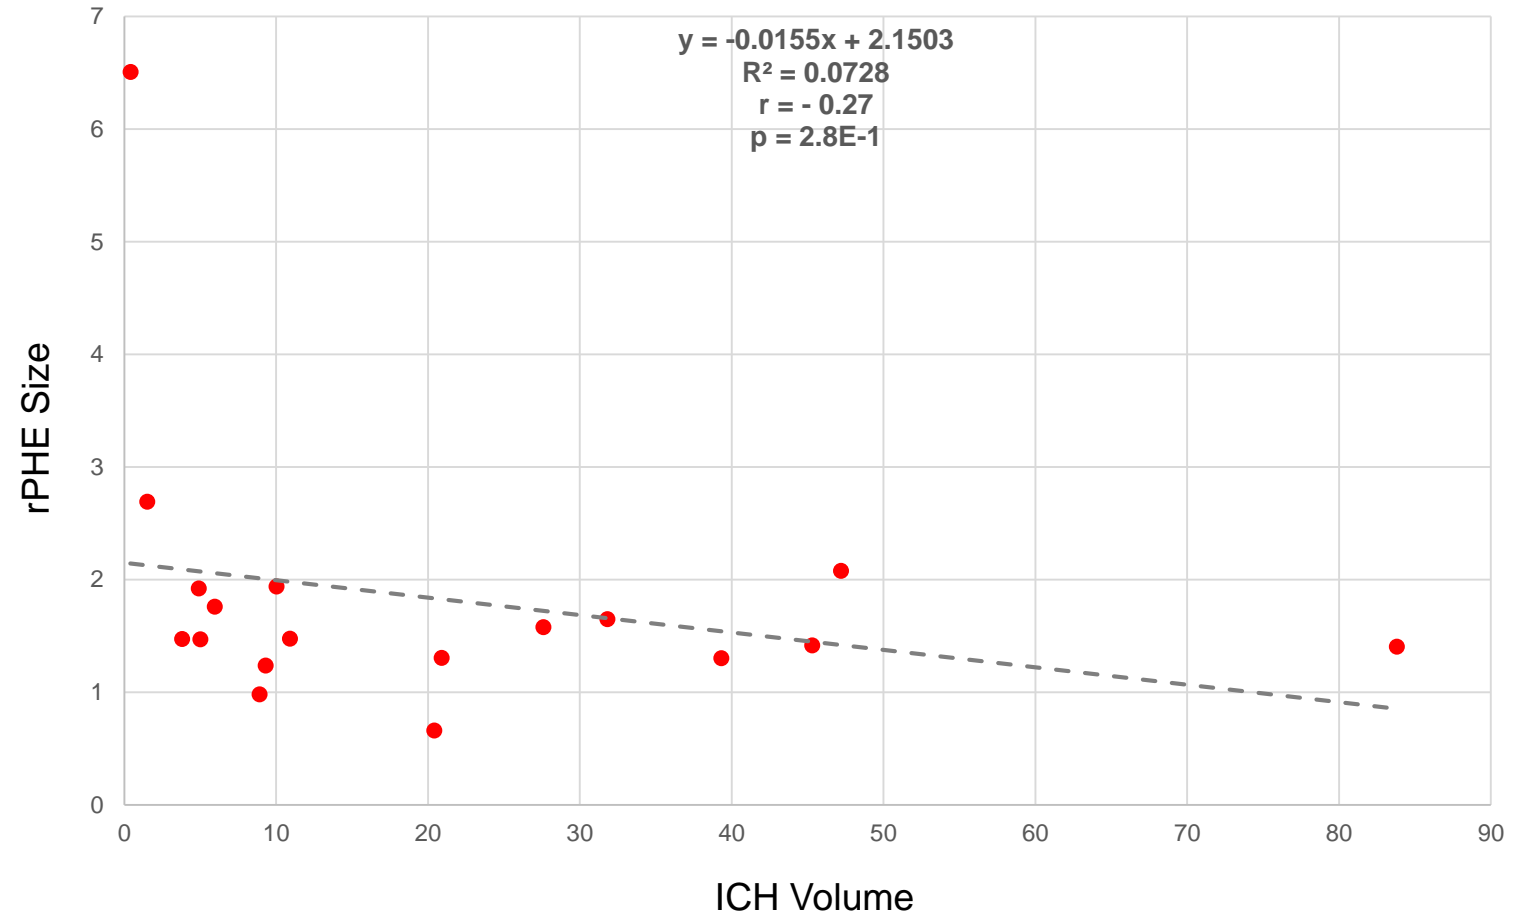

**Fig. S12B** aPHE-rPHE Plot and Correlation

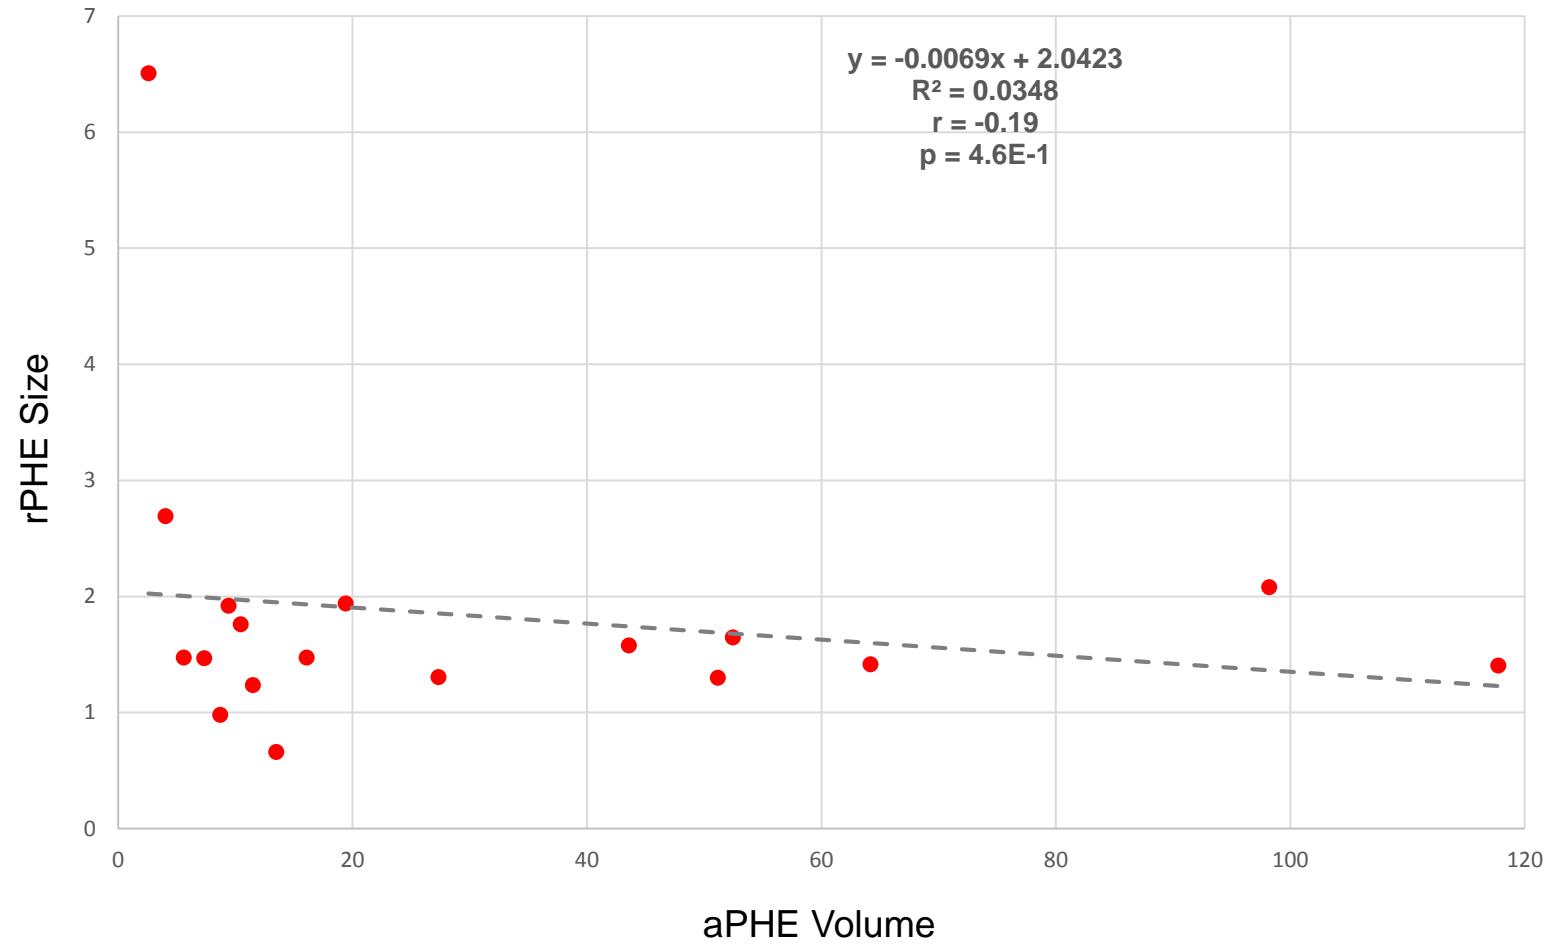





**Fig. S14 ICH Hub Enrichment in Immune and Leukocytic Processes**

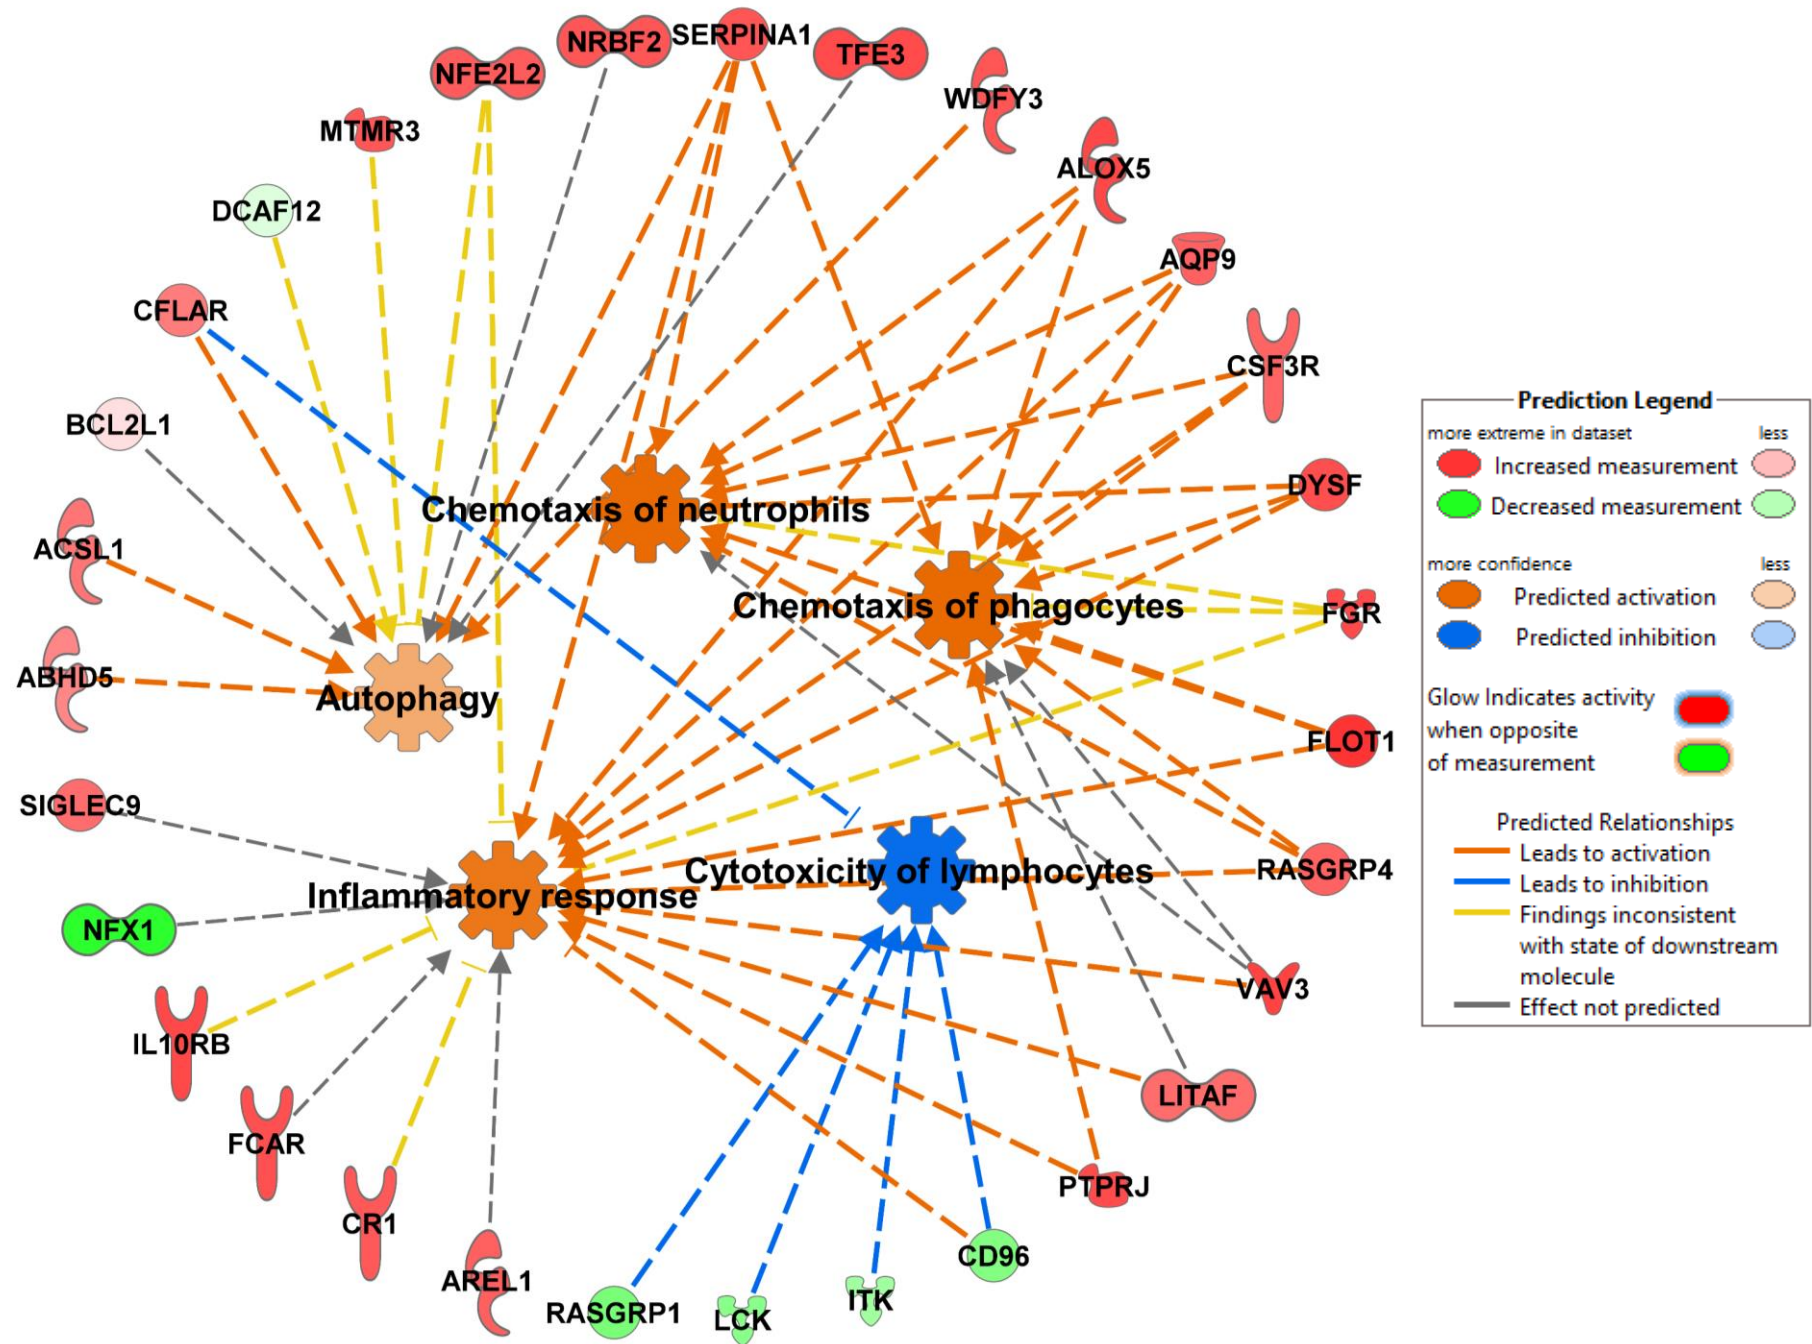



Fig. S16 VCAN VisANT Subnetwork

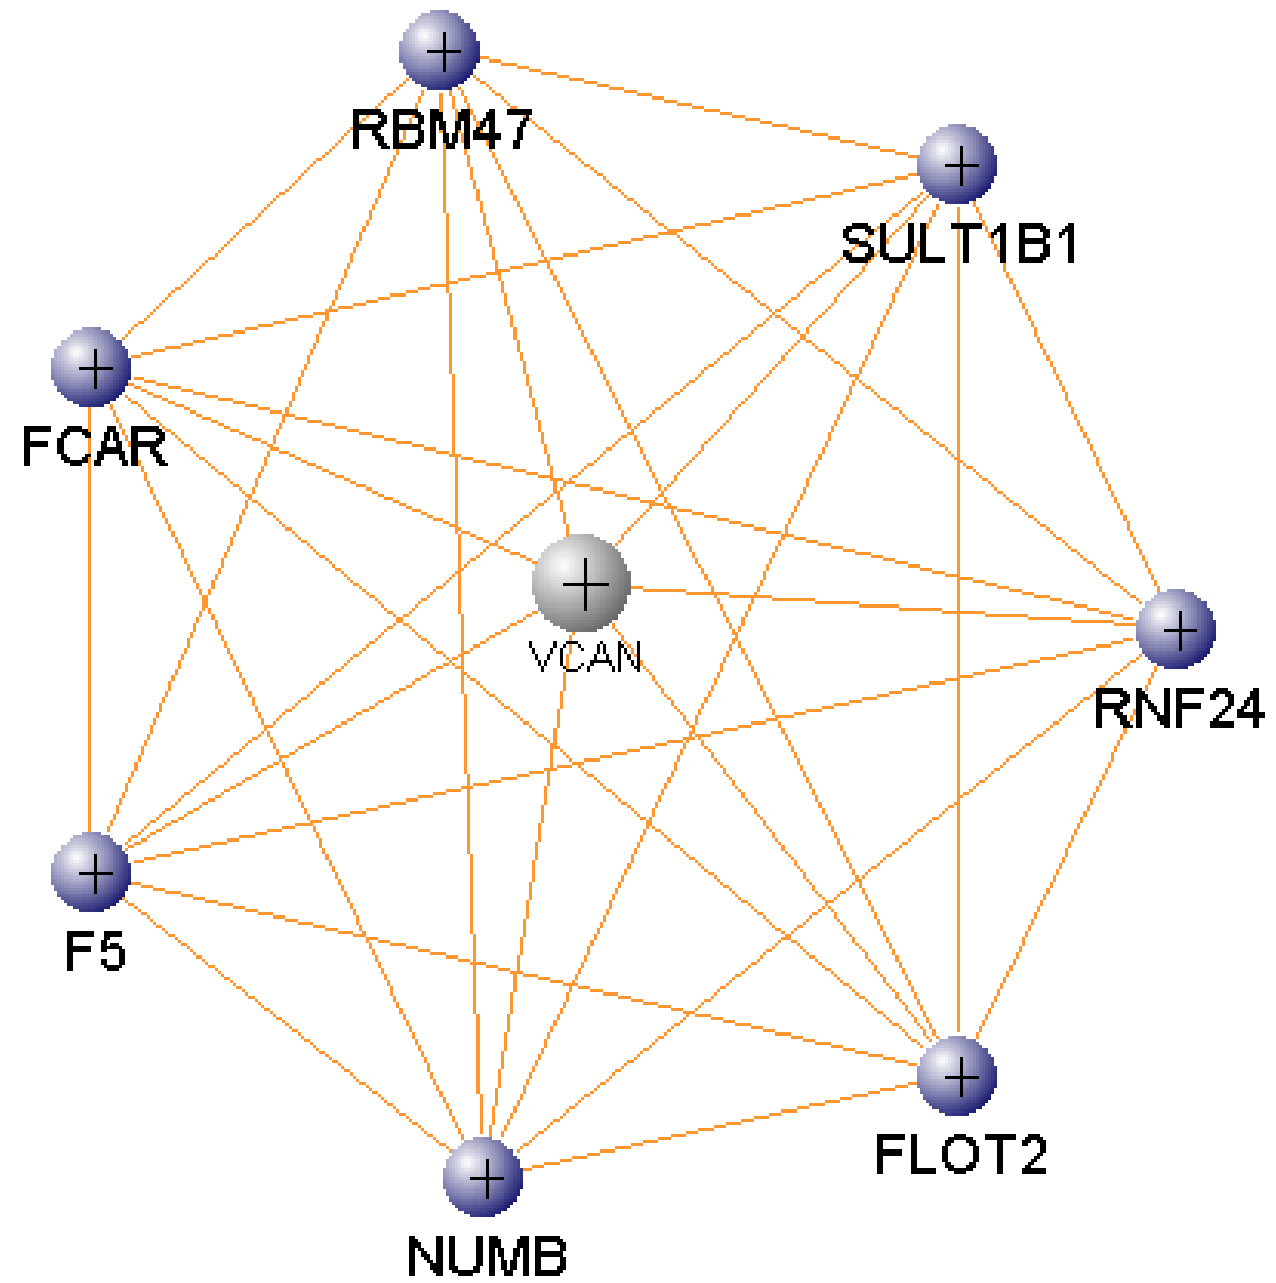

Fig. S17 HMOX1 VisANT Subnetwork

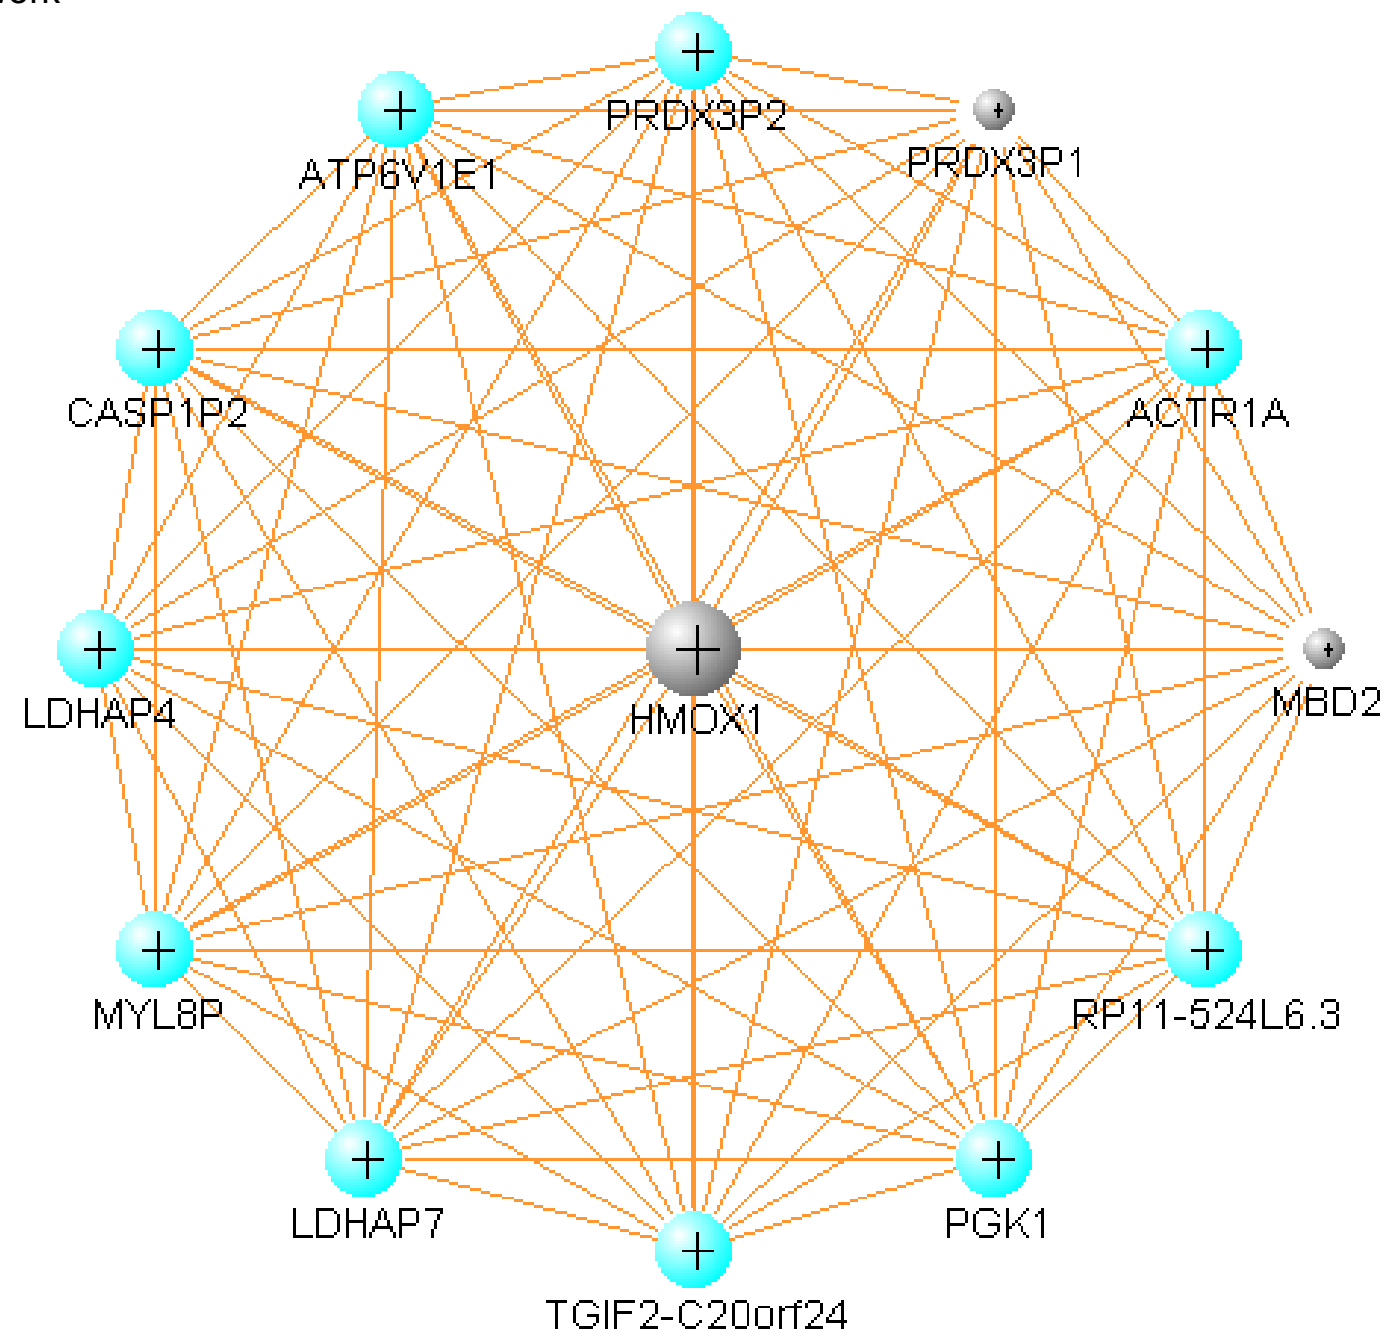







**Fig. S19 RAD50 VisANT Subnetwork**

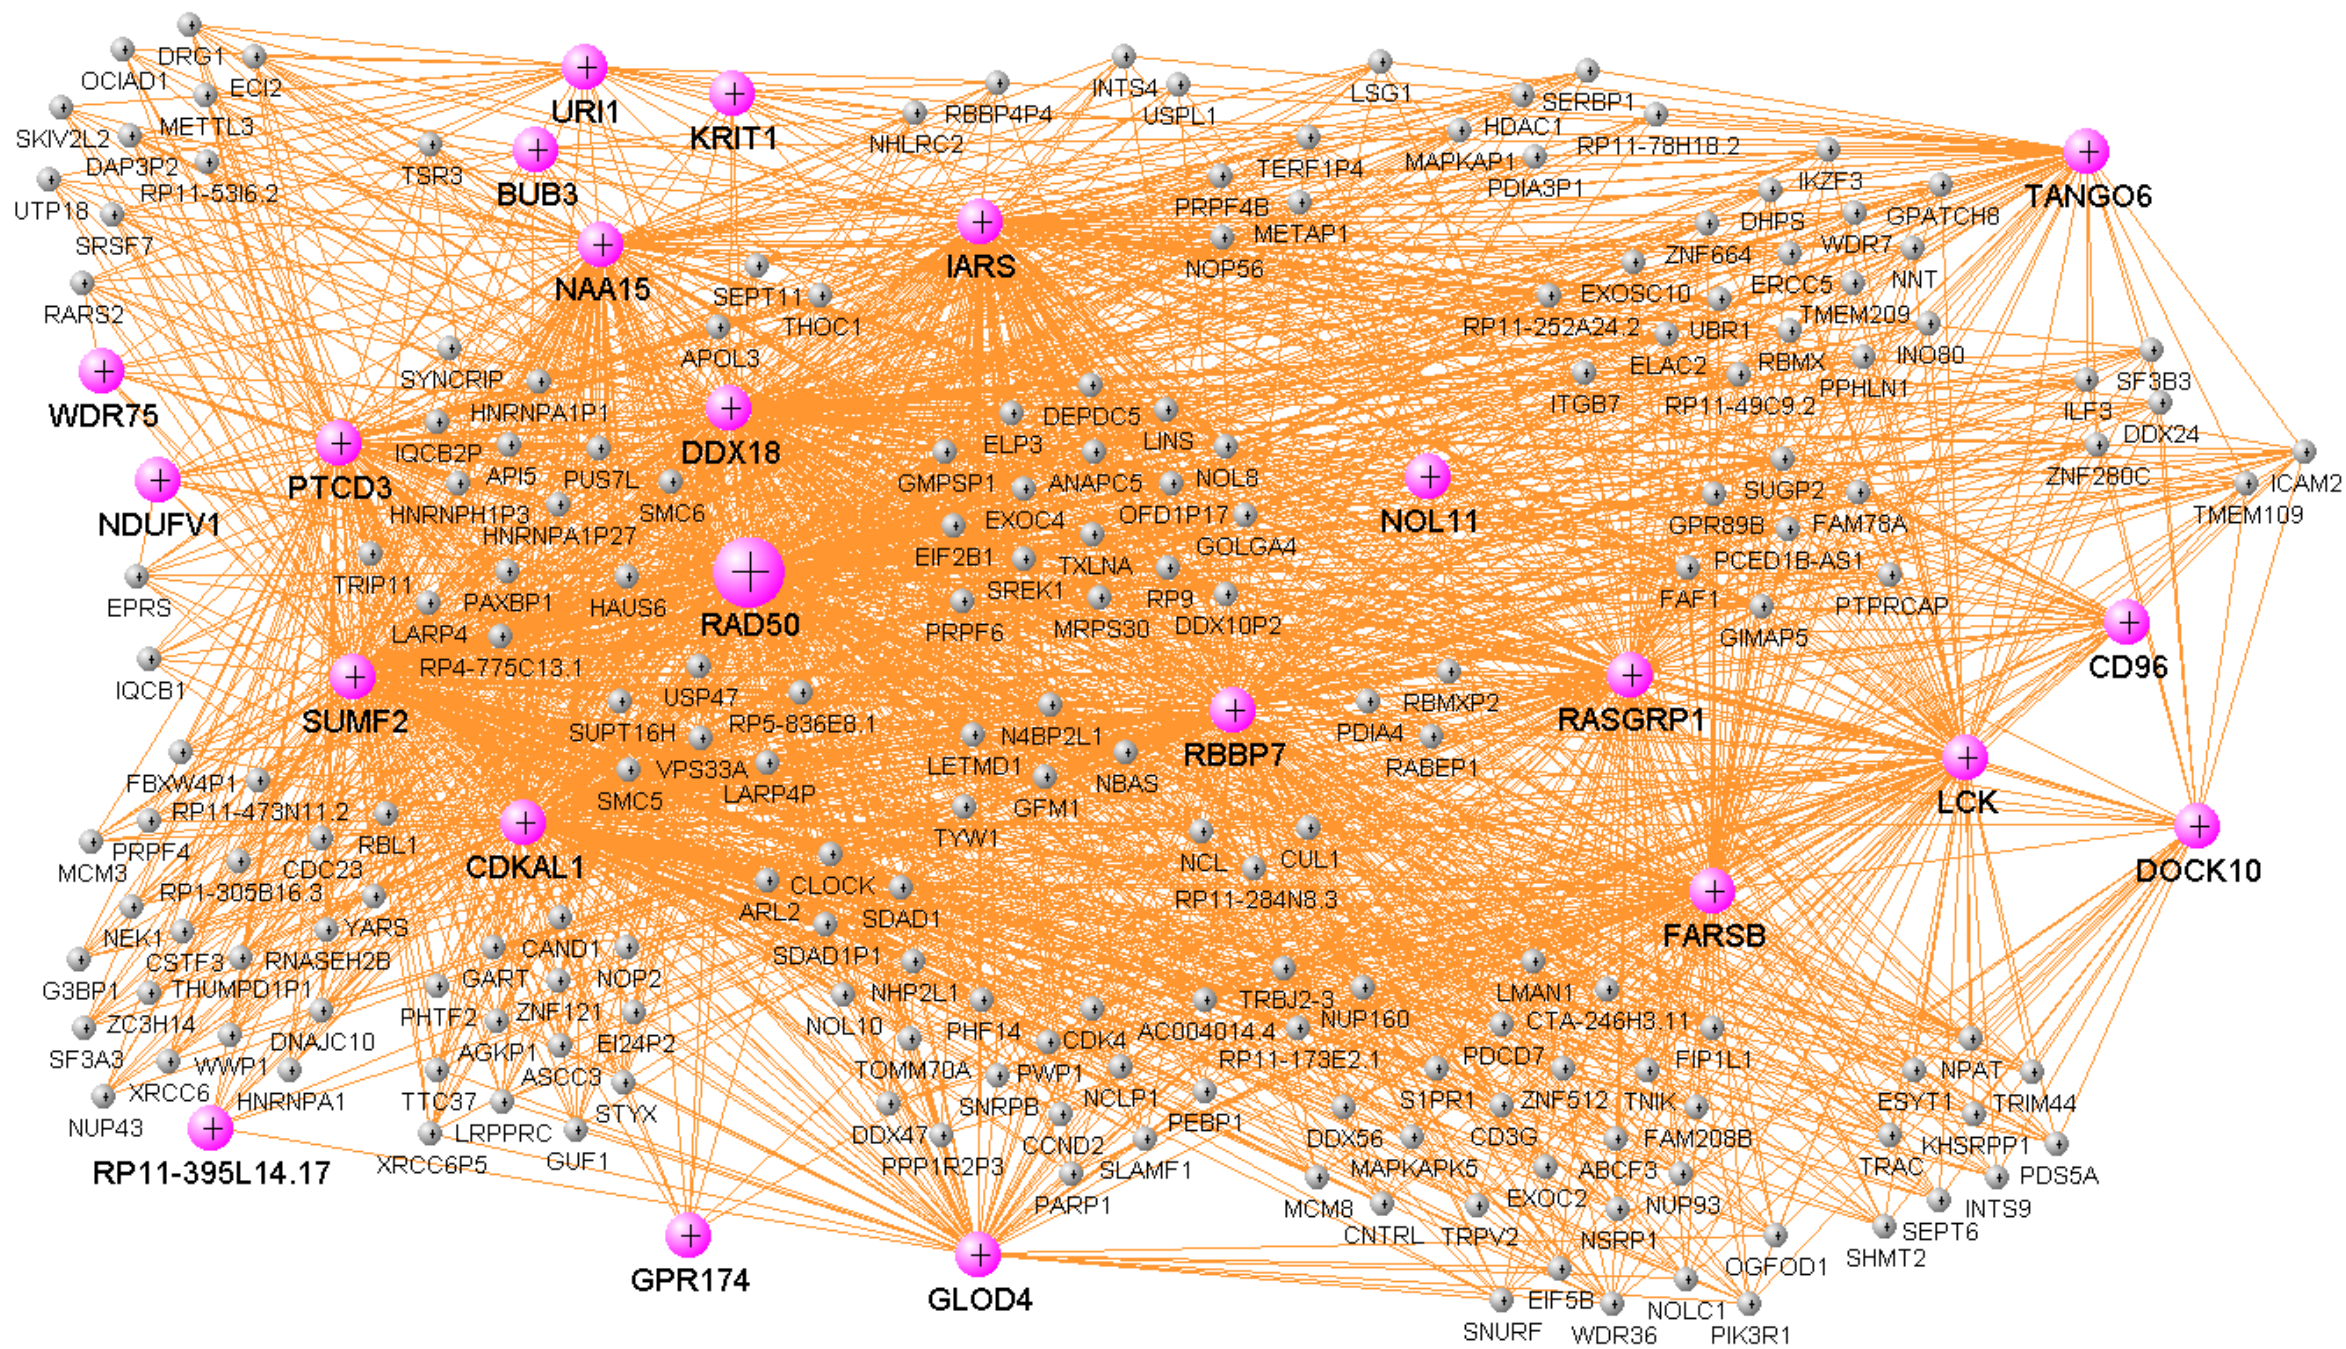

Fig. S20 KCNA3 VisANT Subnetwork

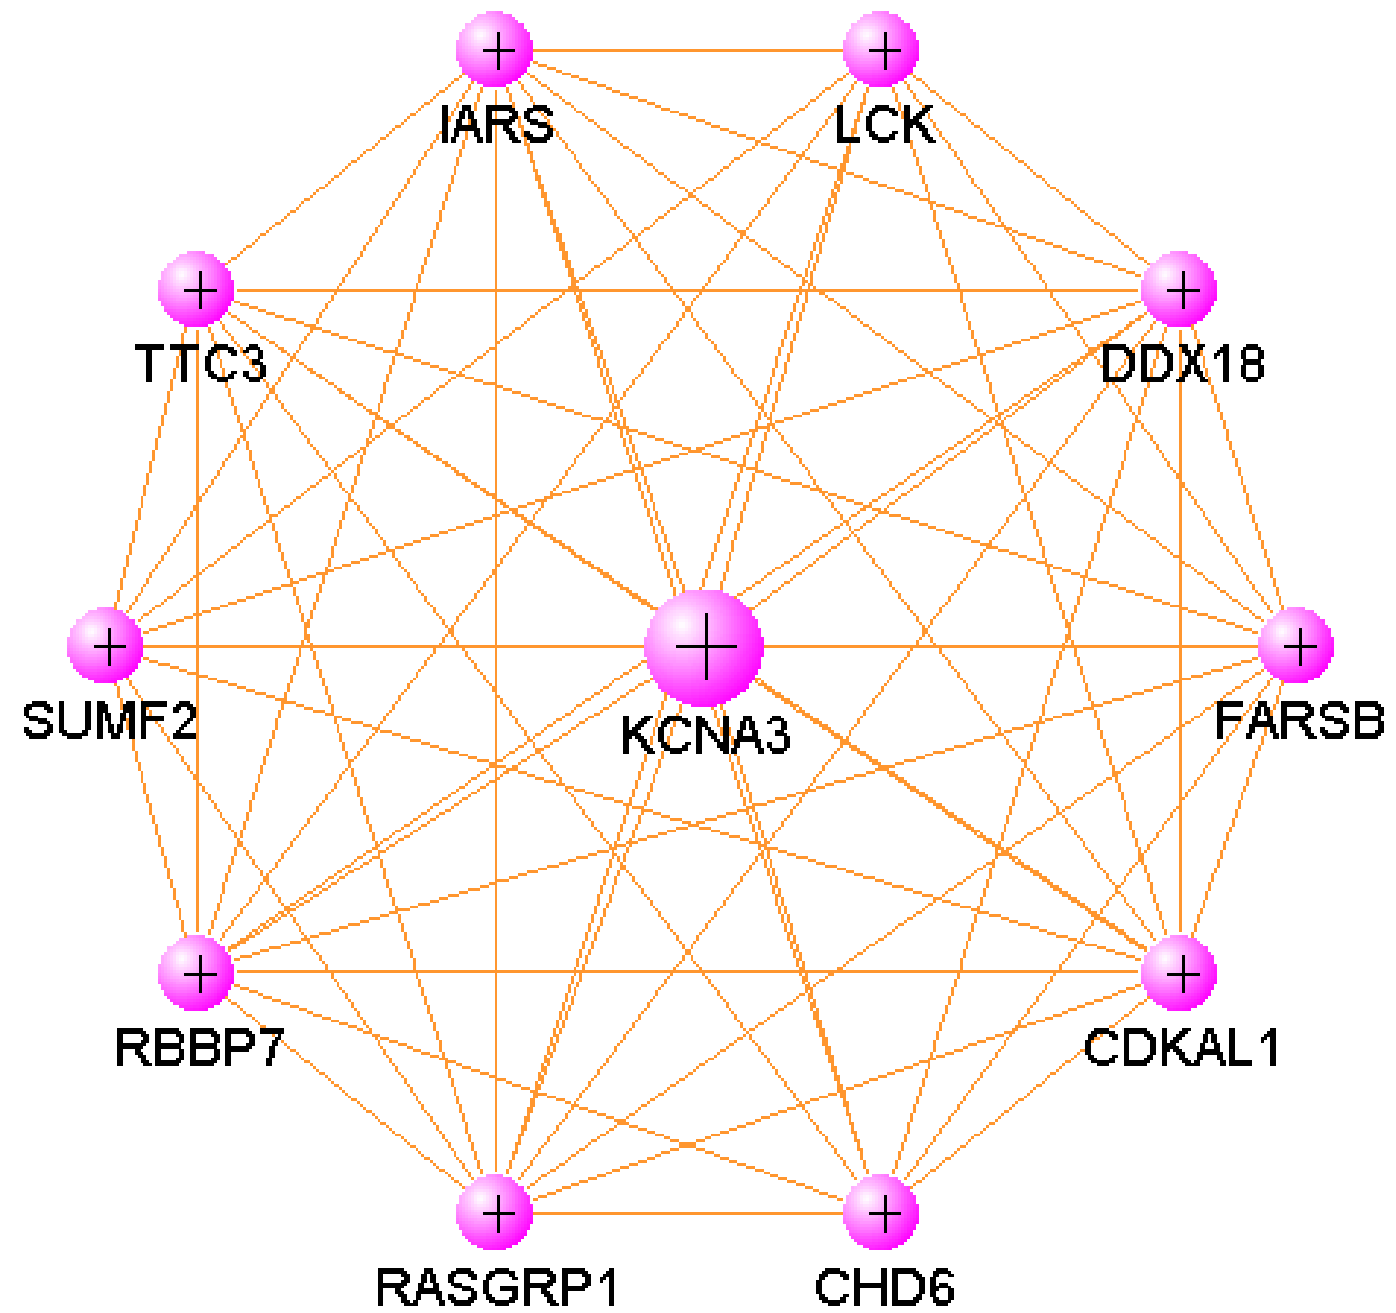

Fig. S21 FBXO21 VisANT Subnetwork

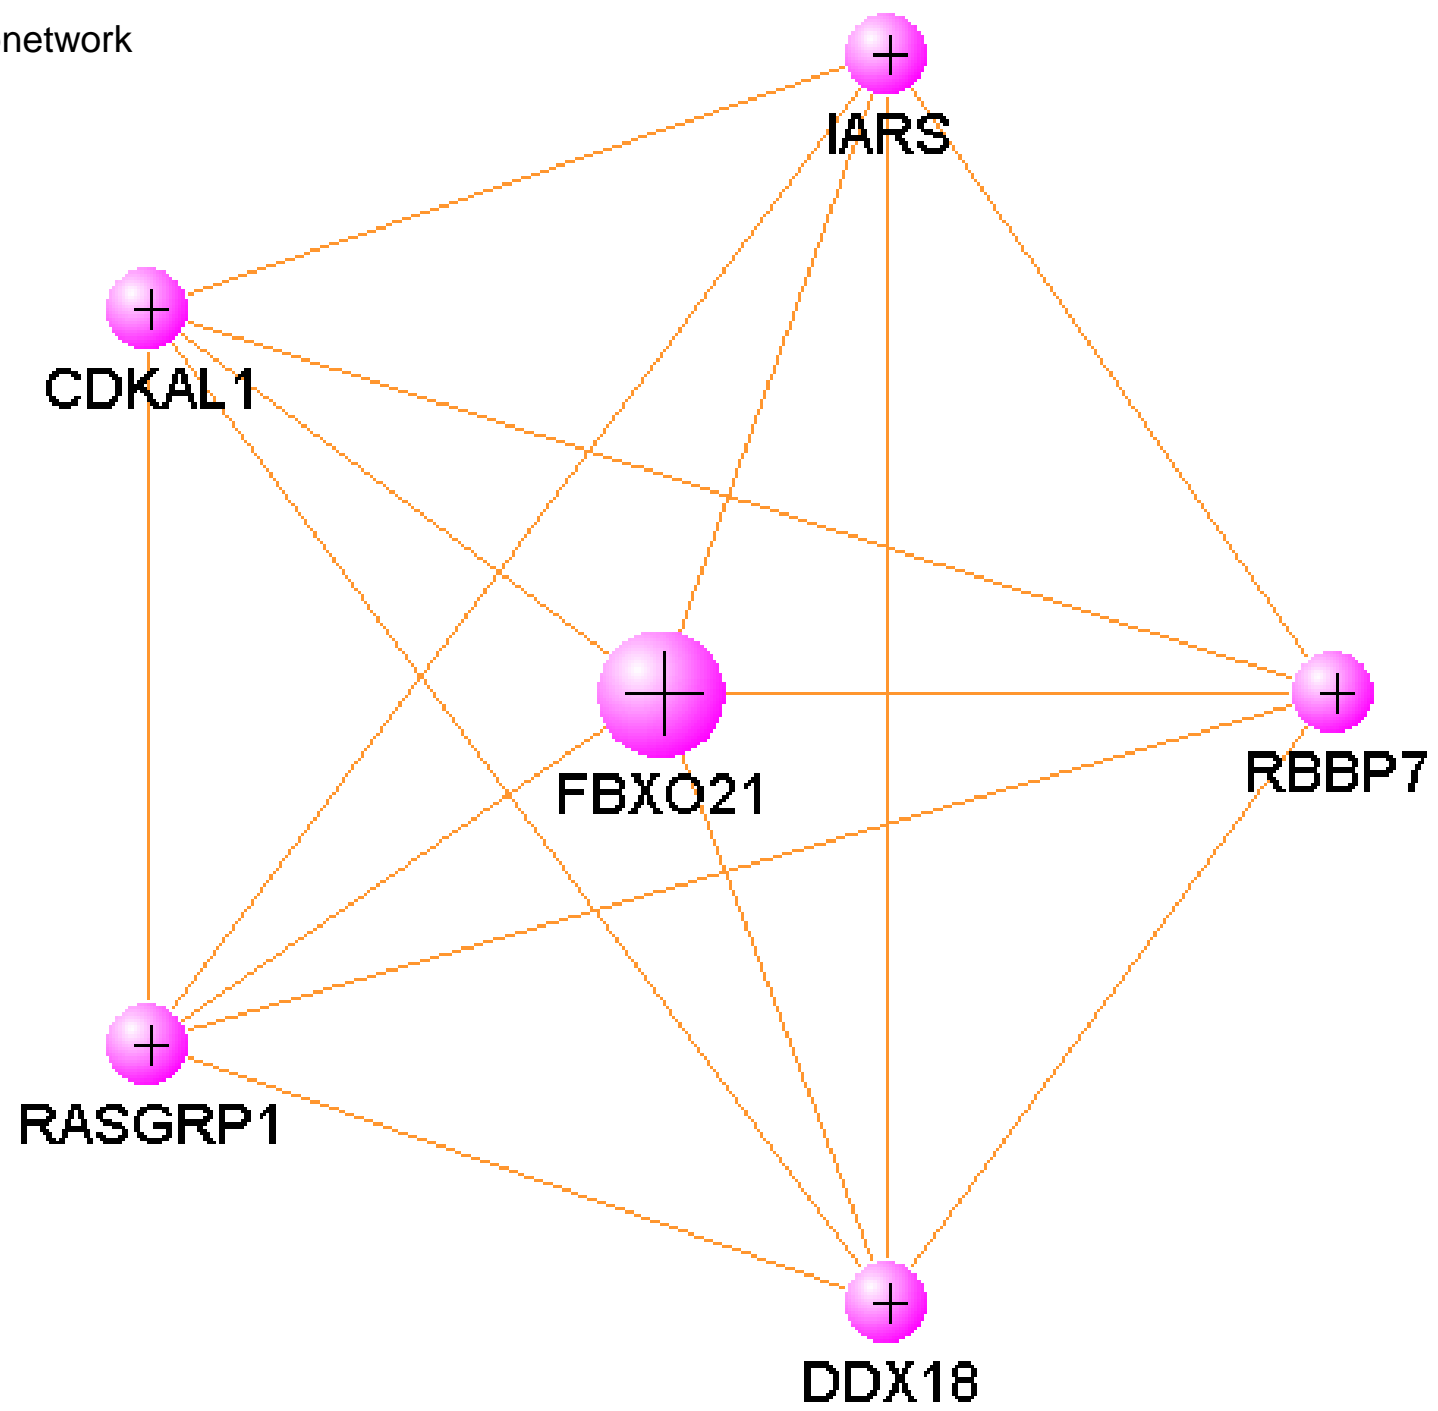

Supplement: 12975_2020_869_MOESM2_ESM.pdf [file 12975_2020_869_MOESM2_ESM.pdf]
