# Supplementary material for: Molecular Correlates of Hemorrhage and Edema Volumes Following Human Intracerebral Hemorrhage Implicate Inflammation, Autophagy, mRNA Splicing, and T Cell Receptor Signaling
Source: PubMed Central journal article supplement (PMC8421315; doi:10.1007/s12975-020-00869-y), 2020-11-18
Supplement: 12975_2020_869_MOESM4_ESM.pdf [file 12975_2020_869_MOESM4_ESM.pdf]

## **ESM 1 Supplemental Methods and Discussion**

Detailed materials and methods as well as additional discussion of the findings of this study.

## **ESM 2 Supplemental Figures**

**Fig. S1** NLRP3 network in the LightGreen module. Genes colored in light green are hub genes

**Fig. S2** NLRC4 network in the MidnightBlue module. Genes colored in midnight blue are hub genes

**Fig. S3** NCF2 network in the GreenYellow module. Genes colored in green yellow are hub genes

**Fig. S4** CSF3R network in the LightGreen module. Genes colored in light green are hub genes

**Fig. S5** T Cell Signaling Pathway enrichment in Magenta module genes shown with predicted activation (orange) and suppression (blue) of associated molecules and relationships. Genes and complexes outlined in purple were present in the Magenta module, and their green shading corresponds to the strength of their negative correlation with ICH volume

**Fig. S6** TRAJ32 network in the Magenta module. Genes colored in magenta are hub genes

**Fig. S7** ITK network in the Magenta module. Genes colored in magenta are hub genes

**Fig. S8** LCK network in the Magenta module. Genes colored in magenta are hub genes

**Fig. S9** S1PR1 network in the Magenta module. Genes colored in magenta are hub genes

**Fig. S10** SKAP1 network in the Magenta module. Genes colored in magenta are hub genes

**Fig. S11** Correlation of patients' aPHE and ICH volumes

**Fig. S12** Correlation of patients' rPHE size and ICH volume (A). Correlation of patients' rPHE size and aPHE volume (B)

**Fig. S13** AQP9 network in the GreenYellow module. Genes colored in green yellow are hub genes

**Fig. S14** Correlations of hub genes in 5 modules significant to ICH predicted the activation of the inflammatory response, autophagy, and the chemotaxis of neutrophils and phagocytes. The cytotoxicity of lymphocytes was predicted to be suppressed

**Fig. S15** Per Gene ICH enrichment in NF- $\kappa$ B Signaling Pathway with predicted activation (orange) and suppression (blue) of associated molecules and relationships. Genes and complexes outlined in purple were present in the Magenta module. Green shading represents the strength of the negative correlation to ICH volume, while red shading represents the strength of the positive correlation to ICH volume

**Fig. S16** VCAN network in the MidnightBlue module. Genes colored in midnight blue are hub genes

**Fig. S17** HMOX1 network in the Cyan module. Genes colored in cyan are hub genes

**Fig. S18** RASGRP1 network in the Magenta module. Genes colored in magenta are hub genes

**Fig. S19** RAD50 network in the Magenta module. Genes colored in magenta are hub genes

**Fig. S20** KCNA3 network in the Magenta module. Genes colored in magenta are hub genes

**Fig. S21** FBXO21 network in the Magenta module. Genes colored in magenta are hub genes

## **ESM 3 Supplemental Tables**

**Table S1** Genes significantly correlated with the volumetric measures ( $p < 0.005$ ,  $|r| > 0.6$ ) in the per gene analyses

**Table S2** IPA Canonical Pathway Enrichment (BH  $p < 0.05$ ) for per gene, significant modules, and hub gene lists

**Table S3** DAVID Gene Ontology (FDR  $p < 0.05$ ) for per gene, significant modules, and hub gene lists

**Table S4** Hypergeometric Probability Testing for per gene, significant modules, and hub gene lists

**Table S5** Gene Assignments for 7 significant modules

**Table S6** Module Significance with respect to volumetric measures, vascular risk factors, and other clinical and demographic characteristics

**Table S7** IPA Disease and Function Enrichment ( $p < 0.05$ ) for per gene, significant modules, and hub gene lists
